# Supplementary material
Source: PubMed Central journal article supplement (PMC11131971)
Supplement: NIHMS1984981-supplement-SI3.pdf [file NIHMS1984981-supplement-SI3.pdf]

*Supporting Information for*

**Systematic Evidence Mapping of Potential Exposure Pathways for Per-  
And Poly-Fluoroalkyl Substances (PFAS) Based on Measured Occurrence  
in Multiple Media**

Chris Holder<sup>a</sup>, Nicole DeLuca<sup>b</sup>, Jeanne Luh<sup>a</sup>, Parnian Alexander<sup>c</sup>, Jeffrey M. Minucci<sup>b</sup>, Daniel A. Vallerio<sup>d</sup>,  
Kent Thomas<sup>b</sup>, Elaine A. Cohen Hubal<sup>b,\*</sup>

<sup>a</sup>ICF, Durham, North Carolina 27713, United States

<sup>b</sup>U.S. EPA, Office of Research and Development, Center for Public Health and Environmental  
Assessment, Research Triangle Park, North Carolina 27711, United States

<sup>c</sup>Formerly ICF, Fairfax, Virginia 22031, United States

<sup>d</sup>U.S. EPA, Office of Research and Development, Center for Computational Toxicology and Exposure,  
Research Triangle Park, North Carolina 27711, United States

\*Email: [Hubal.elaine@epa.gov](mailto:Hubal.elaine@epa.gov); Phone: (919)-541-4077

Number of pages: 24

Number of tables: 6

This Supporting Information contains additional material referenced in the main manuscript. In Section A we present information (two tables) on the literature search strategy and filtering prior to evidence screening. In Section B we present information (three tables) about the specific information fields extracted from each study that underwent full-text screening and data extraction; this section also contains information on incidental extractions, and it ends with references to the two database files containing the data extractions. Finally, in Section C we describe information extracted from biomonitoring/cohort papers (one table plus discussion).

## A Literature Search Strategy

In Table S1 we provide links to the HERO web pages, and when we accessed them to download the search results, along with the search strategies used. The HERO web pages contain results of previously conducted literature searches.

In Table S2 we provide the filters used in SWIFT-Review for different exposure media.

Table S1. Strategies for Previously Conducted Literature Searches, With Links to Health & Environmental Research Online (HERO) Web Pages

| Database                           | Search String                                                                                                                                                                                                                                                                                                                                                                                                                                                                                                                                                                                                                                                                                                                                                                                                                                                                                                                                                                                                                                                                                                                                                                                                                                                                                                                                                                                                                                                                                                                                                                                                                                                                                                                                                                                                                                                                                                                                                                                                                                                                                                                  |
|------------------------------------|--------------------------------------------------------------------------------------------------------------------------------------------------------------------------------------------------------------------------------------------------------------------------------------------------------------------------------------------------------------------------------------------------------------------------------------------------------------------------------------------------------------------------------------------------------------------------------------------------------------------------------------------------------------------------------------------------------------------------------------------------------------------------------------------------------------------------------------------------------------------------------------------------------------------------------------------------------------------------------------------------------------------------------------------------------------------------------------------------------------------------------------------------------------------------------------------------------------------------------------------------------------------------------------------------------------------------------------------------------------------------------------------------------------------------------------------------------------------------------------------------------------------------------------------------------------------------------------------------------------------------------------------------------------------------------------------------------------------------------------------------------------------------------------------------------------------------------------------------------------------------------------------------------------------------------------------------------------------------------------------------------------------------------------------------------------------------------------------------------------------------------|
| <b>PFOA and PFOS</b>               |                                                                                                                                                                                                                                                                                                                                                                                                                                                                                                                                                                                                                                                                                                                                                                                                                                                                                                                                                                                                                                                                                                                                                                                                                                                                                                                                                                                                                                                                                                                                                                                                                                                                                                                                                                                                                                                                                                                                                                                                                                                                                                                                |
| HERO page (accessed 13 July 2020): |                                                                                                                                                                                                                                                                                                                                                                                                                                                                                                                                                                                                                                                                                                                                                                                                                                                                                                                                                                                                                                                                                                                                                                                                                                                                                                                                                                                                                                                                                                                                                                                                                                                                                                                                                                                                                                                                                                                                                                                                                                                                                                                                |
|                                    | <a href="https://hero.epa.gov/hero/index.cfm/project/page/project_id/2608">https://hero.epa.gov/hero/index.cfm/project/page/project_id/2608</a>                                                                                                                                                                                                                                                                                                                                                                                                                                                                                                                                                                                                                                                                                                                                                                                                                                                                                                                                                                                                                                                                                                                                                                                                                                                                                                                                                                                                                                                                                                                                                                                                                                                                                                                                                                                                                                                                                                                                                                                |
| Web of Science                     | (TS="perfluorooctanoic acid" OR TS="perfluorooctane sulfonic acid" OR TS="2,2,3,3,4,4,5,5,6,6,7,7,8,8,8-pentadecafluoro-Octanoic acid" OR TS="2,2,3,3,4,4,5,5,6,6,7,7,8,8,8-pentadecafluoro-Octanoic acid" OR TS="3,3,4,4,5,5,6,6,6-nonafluoro-2-oxo-Hexanoyl fluoride" OR TS="3,3,4,4,5,5,6,6,6-nonafluoro-2-oxo-hexanoyl fluoride" OR TS="Hexanoyl fluoride, 3,3,4,4,5,5,6,6,6-nonafluoro-2-oxo-" OR TS="Octanoic acid, 2,2,3,3,4,4,5,5,6,6,7,7,8,8,8-pentadecafluoro-" OR TS="Pentadecafluoro-1-octanoic acid" OR TS="Pentadecafluoro-n-octanoic acid" OR TS="PentadecafluoroOctanoic acid" OR TS="Perfluorocaprylic acid" OR TS="Perfluorooctanoic acid" OR TS="Perfluoroheptanecarboxylic acid" OR TS="Perfluorooctanoic acid" OR TS="Octanoic acid, pentadecafluoro-" OR TS="Perfluorooctanoate" OR TS="A 5717" OR TS="EF 201" OR TS="Eftop EF 201" OR TS="Perfluoro-1-heptanecarboxylic acid" OR TS="1,1,2,2,3,3,4,4,5,5,6,6,7,7,8,8,8-Heptadecafluoro-1-octanesulfonic acid" OR TS="1-Octanesulfonic acid, 1,1,2,2,3,3,4,4,5,5,6,6,7,7,8,8,8-heptadecafluoro-" OR TS="1-Perfluorooctanesulfonic acid" OR TS="EF 101" OR TS="Eftop EF 101" OR TS="Heptadecafluoro-1-octanesulfonic acid" OR TS="HeptadecafluoroOctane-1-sulphonic acid" OR TS="Perfluorooctane sulfonate" OR TS="Perfluorooctane sulfonic acid" OR TS="Perfluorooctanesulfonic acid" OR TS="Perfluorooctylsulfonic acid" OR TS="1-Octanesulfonic acid, heptadecafluoro-" OR TS="HeptadecafluoroOctanesulfonic acid" OR TS="Perfluoro-n-octanesulfonic acid" OR TS="Perfluorooctane Sulphonic Acid" OR TS="Perfluorooctanesulfonate" OR TS="Perfluorooctylsulfonate" OR ((TS="PFOA" OR TS="PFOS") AND (TS="fluorocarbon*" OR TS="fluorotelomer*" OR TS="polyfluoro*" OR TS="perfluoro-*" OR TS="perfluoroa*" OR TS="perfluorob*" OR TS="perfluoroc*" OR TS="perfluorod*" OR TS="perfluoroe*" OR TS="perfluoroh*" OR TS="perfluoron*" OR TS="perfluoroo*" OR TS="perfluorop*" OR TS="perfluoros*" OR TS="perfluorou*" OR TS="perfluorinated" OR TS="fluorinated" OR TS="PFAS"))))                                                                         |
| PubMed                             | (335-67-1[rn] OR 1763-23-1[rn] OR 45298-90-6[rn] OR "perfluorooctanoic acid"[nm] OR "perfluorooctane sulfonic acid"[nm] OR "2,2,3,3,4,4,5,5,6,6,7,7,8,8,8-pentadecafluoro-Octanoic acid"[tw] OR "2,2,3,3,4,4,5,5,6,6,7,7,8,8,8-pentadecafluoroOctanoic acid"[tw] OR "3,3,4,4,5,5,6,6,6-nonafluoro-2-oxo-Hexanoyl fluoride"[tw] OR "3,3,4,4,5,5,6,6,6-nonafluoro-2-oxo-hexanoyl fluoride"[tw] OR "Hexanoyl fluoride, 3,3,4,4,5,5,6,6,6-nonafluoro-2-oxo-"[tw] OR "Octanoic acid, 2,2,3,3,4,4,5,5,6,6,7,7,8,8,8-pentadecafluoro-"[tw] OR "Pentadecafluoro-1-octanoic acid"[tw] OR "Pentadecafluoro-n-octanoic acid"[tw] OR "PentadecafluoroOctanoic acid"[tw] OR "Perfluorocaprylic acid"[tw] OR "Perfluorooctanoic acid"[tw] OR "Perfluoroheptanecarboxylic acid"[tw] OR "Perfluorooctanoic acid"[tw] OR "Octanoic acid, pentadecafluoro-"[tw] OR "Perfluorooctanoate"[tw] OR "A 5717"[tw] OR "EF 201"[tw] OR "Eftop EF 201"[tw] OR "Perfluoro-1-heptanecarboxylic acid"[tw] OR "1,1,2,2,3,3,4,4,5,5,6,6,7,7,8,8,8-Heptadecafluoro-1-octanesulfonic acid"[tw] OR "1-Octanesulfonic acid, 1,1,2,2,3,3,4,4,5,5,6,6,7,7,8,8,8-heptadecafluoro-"[tw] OR "1-Perfluorooctanesulfonic acid"[tw] OR "EF 101"[tw] OR "Eftop EF 101"[tw] OR "Heptadecafluoro-1-octanesulfonic acid"[tw] OR "HeptadecafluoroOctane-1-sulphonic acid"[tw] OR "Perfluorooctane sulfonate"[tw] OR "Perfluorooctane sulfonic acid"[tw] OR "Perfluorooctanesulfonic acid"[tw] OR "Perfluorooctylsulfonic acid"[tw] OR "1-Octanesulfonic acid, heptadecafluoro-"[tw] OR "HeptadecafluoroOctanesulfonic acid"[tw] OR "Perfluoro-n-octanesulfonic acid"[tw] OR "Perfluorooctane Sulphonic Acid"[tw] OR "Perfluorooctanesulfonate"[tw] OR "Perfluorooctylsulfonate"[tw] OR ((("PFOA"[tw] OR "PFOS"[tw]) AND (fluorocarbon*[tw] OR fluorotelomer*[tw] OR polyfluoro*[tw] OR perfluoro-*[tw] OR perfluoroa*[tw] OR perfluorob*[tw] OR perfluoroc*[tw] OR perfluorod*[tw] OR perfluoroe*[tw] OR perfluoroh*[tw] OR perfluoron*[tw] OR perfluoroo*[tw] OR perfluorop*[tw] OR perfluoros*[tw] OR perfluorou*[tw] OR perfluorinated[tw] OR fluorinated[tw] OR PFAS[tw]))) |

| Database           | Search String                                                                                                                                                                                                                                                                                                                                                                                                                                                                                                                                                                                                                                                                                                                                                                                                                                                                                                                                                                                                                                                                                                                                                                                                                                                                                                                                                                                                                                                                                                                                                                                                                                                                                                                                                                              |
|--------------------|--------------------------------------------------------------------------------------------------------------------------------------------------------------------------------------------------------------------------------------------------------------------------------------------------------------------------------------------------------------------------------------------------------------------------------------------------------------------------------------------------------------------------------------------------------------------------------------------------------------------------------------------------------------------------------------------------------------------------------------------------------------------------------------------------------------------------------------------------------------------------------------------------------------------------------------------------------------------------------------------------------------------------------------------------------------------------------------------------------------------------------------------------------------------------------------------------------------------------------------------------------------------------------------------------------------------------------------------------------------------------------------------------------------------------------------------------------------------------------------------------------------------------------------------------------------------------------------------------------------------------------------------------------------------------------------------------------------------------------------------------------------------------------------------|
| ToxNet             | <p>@SYNO+@AND+@OR+("perfluorooctanoic+acid"+"perfluorooctane+sulfonic+acid"+"3,3,4,4,5,5,6,6,6-nonafluoro-2-oxo-Hexanoyl+fluoride"+"3,3,4,4,5,5,6,6,6-nonafluoro-2-oxohexanoyl+fluoride"+"Hexanoyl+fluoride+3,3,4,4,5,5,6,6,6-nonafluoro-2-oxo-"+"Octanoic+acid+2,2,3,3,4,4,5,5,6,6,7,7,8,8,8-pentadecafluoro-"+"Pentadecafluoro-1-octanoic+acid"+"Pentadecafluoro-n-octanoic+acid"+"Pentadecafluoroctanoic+acid"+"Perfluorocaprylic+acid"+"Perfluorooctanoic+acid"+"Perfluoroheptanecarbonylic+acid"+"Perfluorooctanoic+acid"+"Octanoic+acid+pentadecafluoro"+"Perfluorooctanoate"+"A+5717"+"EF+201"+"Eftop+EF+201"+"Perfluoro-1-heptanecarboxylic+acid")+@RANGE+yr+2000+2019+@NOT+@org+nih+pubmed+pubdart</p> <p>@SYNO+@AND+@OR+("1-Octanesulfonic+acid+1,1,2,2,3,3,4,4,5,5,6,6,7,7,8,8,8-heptadecafluoro-"+"1-Perfluorooctanesulfonic+acid"+"EF+101"+"Eftop+EF+101"+"Heptadecafluoro-1-octanesulfonic+acid"+"Heptadecafluoroctane-1-sulphonic+acid"+"Perfluorooctane+sulfonate"+"Perfluorooctane+sulfonic+acid"+"Perfluorooctanesulfonic+acid"+"Perfluorooctylsulfonic+acid"+"1-Octanesulfonic+acid+heptadecafluoro-"+"Heptadecafluoroctanesulfonic+acid"+"Perfluoro-n-octanesulfonic+acid"+"Perfluorooctane+Sulphonic+Acid"+"Perfluorooctanesulfonate+Perfluorooctylsulfonate+@TERM+@rn+335-67-1+@TERM+@rn+1763-23-1+@TERM+@rn+45298-90-6)+@RANGE+yr+2000+2019+@NOT+@org+nih+pubmed+pubdart</p> <p>@SYNO+@AND+@OR+(PFOA+PFOS+(fluorocarbon*+fluorotelomer*+polyfluoro*+perfluoroa*+perfluorob*+perfluoroc*+perfluorod*+perfluoroe*))+@RANGE+yr+2000+2019+@NOT+@org+nih+pubmed+pubdart</p> <p>@SYNO+@AND+@OR+(PFOA+PFOS+(perfluoroh*+perfluoron*+perfluoroo*+perfluorop*+perfluoros*+perfluorou*+perfluorinated+fluorinated+PFAS))+@RANGE+yr+2000+2019+@NOT+@org+nih+pubmed+pubdart</p> |
| <b>PFBA</b>        |                                                                                                                                                                                                                                                                                                                                                                                                                                                                                                                                                                                                                                                                                                                                                                                                                                                                                                                                                                                                                                                                                                                                                                                                                                                                                                                                                                                                                                                                                                                                                                                                                                                                                                                                                                                            |
|                    | HERO page (accessed 28 May 2020):<br><a href="https://hero.epa.gov/hero/index.cfm/project/page/project_id/2632">https://hero.epa.gov/hero/index.cfm/project/page/project_id/2632</a>                                                                                                                                                                                                                                                                                                                                                                                                                                                                                                                                                                                                                                                                                                                                                                                                                                                                                                                                                                                                                                                                                                                                                                                                                                                                                                                                                                                                                                                                                                                                                                                                       |
| Web of Science     | TS="Heptafluoro-1-butanoic acid" OR TS="Heptafluorobutanoic acid" OR TS="Heptafluorobutyric acid" OR TS="Kyselina heptafluormaselna" OR TS="Perfluorobutanoic acid" OR TS="Perfluorobutyric acid" OR TS="Perfluoropropanecarboxylic acid" OR TS="2,2,3,3,4,4,4-heptafluoro-Butanoic acid" OR TS="Butanoic acid, 2,2,3,3,4,4,4-heptafluoro-" OR TS="Butanoic acid, heptafluoro-" OR TS="Perfluoro-n-butanoic acid" OR TS="Perfluorobutanoate" OR TS="2,2,3,3,4,4,4-Heptafluorobutanoic acid" OR TS="Butyric acid, heptafluoro-" OR TS="Fluorad FC 23" OR TS="H 0024" OR TS="NSC 820" OR (TS=(PFBA OR "FC 23" OR HFBA) AND TS=(fluorocarbon* OR fluorotelomer* OR polyfluoro* OR perfluoro-* OR perfluoroa* OR perfluorob* OR perfluoroc* OR perfluorod* OR perfluoroe* OR perfluoroh* OR perfluoron* OR perfluoroo* OR perfluorop* OR perfluoros* OR perfluorou* OR perfluorinated OR PFAS OR PFOS OR PFOA))                                                                                                                                                                                                                                                                                                                                                                                                                                                                                                                                                                                                                                                                                                                                                                                                                                                                                |
| PubMed             | 375-22-4[rn] OR "Heptafluoro-1-butanoic acid"[tw] OR "Heptafluorobutanoic acid"[tw] OR "Heptafluorobutyric acid"[tw] OR "Kyselina heptafluormaselna"[tw] OR "Perfluorobutanoic acid"[tw] OR "Perfluorobutyric acid"[tw] OR "Perfluoropropanecarboxylic acid"[tw] OR "2,2,3,3,4,4,4-heptafluoro-Butanoic acid"[tw] OR "Butanoic acid, 2,2,3,3,4,4,4-heptafluoro-"[tw] OR "Butanoic acid, heptafluoro-"[tw] OR "Perfluoro-n-butanoic acid"[tw] OR "Perfluorobutanoate"[tw] OR "2,2,3,3,4,4,4-Heptafluorobutanoic acid"[tw] OR "Butyric acid, heptafluoro-"[tw] OR "Fluorad FC 23"[tw] OR "H 0024"[tw] OR "NSC 820"[tw] OR ((PFBA[tw] OR "FC 23"[tw] OR HFBA[tw]) AND (fluorocarbon*[tw] OR fluorotelomer*[tw] OR polyfluoro*[tw] OR perfluoro-*[tw] OR perfluoroa*[tw] OR perfluorob*[tw] OR perfluoroc*[tw] OR perfluorod*[tw] OR perfluoroe*[tw] OR perfluoroh*[tw] OR perfluoron*[tw] OR perfluoroo*[tw] OR perfluorop*[tw] OR perfluoros*[tw] OR perfluorou*[tw] OR perfluorinated[tw] OR fluorinated[tw] OR PFAS[tw] OR PFOS[tw] OR PFOA[tw]))                                                                                                                                                                                                                                                                                                                                                                                                                                                                                                                                                                                                                                                                                                                                          |
| ToxLine/<br>ToxNet | ( 375-22-4 [rn] OR "heptafluoro-1-butanoic acid" OR "heptafluorobutanoic acid" OR "heptafluorobutyric acid" OR "kyselina heptafluormaselna" OR "perfluorobutanoic acid" OR "perfluorobutyric acid" OR "perfluoropropanecarboxylic acid" OR "2,2,3,3,4,4,4-heptafluoro-butanoic acid" OR "butanoic acid 2 2 3 3 4 4 4-heptafluoro-" OR "butanoic acid heptafluoro-" OR "perfluoro-n-butanoic acid" OR "perfluorobutanoate" OR "2,2,3,3,4,4,4-heptafluorobutanoic acid" OR "butyric acid heptafluoro-" OR "fluorad fc 23" OR "h 0024" OR "nsc 820" OR ( ( pfba OR "fc 23" OR hfba ) AND ( fluorocarbon* OR fluorotelomer* OR polyfluoro* OR perfluoro* OR perfluorinated OR fluorinated OR pfas OR pfos OR pfoa ) ) ) AND ( ANEUPL [org] OR BIOSIS [org] OR CIS [org] OR DART [org] OR EMIC [org] OR EPIDEM [org] OR HEEP [org] OR HMTc [org] OR IPA [org] OR RISKLINE [org] OR MTGABS [org] OR NIOSH [org] OR NTIS [org] OR PESTAB [org] OR PPBIB [org] ) AND NOT PubMed [org] AND NOT pubdart [org]                                                                                                                                                                                                                                                                                                                                                                                                                                                                                                                                                                                                                                                                                                                                                                                        |

| Database                                                                                                                                                                             | Search String                                                                                                                                                                                                                                                                                                                                                                                                                                                                                                                                                                                                                                                                                                                                                                                                                                                                                                                                                                                                                                                                           |
|--------------------------------------------------------------------------------------------------------------------------------------------------------------------------------------|-----------------------------------------------------------------------------------------------------------------------------------------------------------------------------------------------------------------------------------------------------------------------------------------------------------------------------------------------------------------------------------------------------------------------------------------------------------------------------------------------------------------------------------------------------------------------------------------------------------------------------------------------------------------------------------------------------------------------------------------------------------------------------------------------------------------------------------------------------------------------------------------------------------------------------------------------------------------------------------------------------------------------------------------------------------------------------------------|
| <b>PFBS</b>                                                                                                                                                                          |                                                                                                                                                                                                                                                                                                                                                                                                                                                                                                                                                                                                                                                                                                                                                                                                                                                                                                                                                                                                                                                                                         |
| HERO page (accessed 1 June 2020):<br><a href="https://hero.epa.gov/hero/index.cfm/project/page/project_id/2610">https://hero.epa.gov/hero/index.cfm/project/page/project_id/2610</a> |                                                                                                                                                                                                                                                                                                                                                                                                                                                                                                                                                                                                                                                                                                                                                                                                                                                                                                                                                                                                                                                                                         |
| Web of Science                                                                                                                                                                       | TS="1,1,2,2,3,3,4,4,4-Nonafluoro-1-butanefluoro-1-sulfonic acid" OR TS="1-Perfluorobutanefluoro-1-sulfonic acid" OR TS="Nonafluoro-1-butanefluoro-1-sulfonic acid" OR TS="Nonafluorobutanefluoro-1-sulfonic acid" OR TS="Perfluorobutanefluoro-1-sulfonic acid" OR TS="1,1,2,2,3,3,4,4,4-Nonafluorobutane-1-sulphonic acid" OR TS="Perfluorobutane sulfonic acid" OR TS="Perfluorobutanefluoro-1-sulfonate" OR TS="Perfluorobutane sulfonate" OR TS="1-Butanesulfonic acid, 1,1,2,2,3,3,4,4,4-nonafluoro-" OR TS="1-Butanesulfonic acid, nonafluoro-" OR TS="Perfluoro-1-butanefluoro-1-sulfonate" OR TS="Perfluorobutylsulfonate" OR TS="Eftop FBSA" OR (TS=PFBS AND TS=(fluorocarbon* OR fluorotelomer* OR polyfluoro* OR perfluoro-* OR perfluoroa* OR perfluorob* OR perfluoroc* OR perfluorod* OR perfluoroeh* OR perfluoroh* OR perfluoron* OR perfluoroo* OR perfluorop* OR perfluorou* OR perfluorinated OR fluorinated OR PFAS OR PFOS OR PFOA))                                                                                                                               |
| PubMed                                                                                                                                                                               | 375-73-5[rn] OR 45187-15-3[rn] "nonafluorobutane-1-sulfonic acid"[nm] OR "1,1,2,2,3,3,4,4,4-Nonafluoro-1-butanefluoro-1-sulfonic acid"[tw] OR "1-Perfluorobutanefluoro-1-sulfonic acid"[tw] OR "Nonafluoro-1-butanefluoro-1-sulfonic acid"[tw] OR "Nonafluorobutanefluoro-1-sulfonic acid"[tw] OR "Perfluorobutanefluoro-1-sulfonic acid"[tw] OR "1,1,2,2,3,3,4,4,4-Nonafluorobutane-1-sulphonic acid"[tw] OR "Perfluorobutane sulfonic acid"[tw] OR "Perfluorobutanefluoro-1-sulfonate"[tw] OR "1-Butanesulfonic acid, 1,1,2,2,3,3,4,4,4-nonafluoro-"[tw] OR "1-Butanesulfonic acid, nonafluoro-"[tw] OR "Perfluoro-1-butanefluoro-1-sulfonate"[tw] OR "Perfluorobutylsulfonate"[tw] OR "Eftop FBSA"[tw] OR (PFBS[tw] AND (fluorocarbon*[tw] OR fluorotelomer*[tw] OR polyfluoro*[tw] OR perfluoro-*[tw] OR perfluoroa*[tw] OR perfluorob*[tw] OR perfluoroc*[tw] OR perfluorod*[tw] OR perfluoroeh*[tw] OR perfluoroh*[tw] OR perfluoron*[tw] OR perfluoroo*[tw] OR perfluorop*[tw] OR perfluorou*[tw] OR perfluorinated[tw] OR fluorinated[tw] OR PFAS[tw] OR PFOS[tw] OR PFOA[tw])) |
| ToxLine                                                                                                                                                                              | (( 375-73-5 [rn] OR 45187-15-3 [rn] OR "1 1 2 2 3 3 4 4 4-nonafluoro-1-butanefluoro-1-sulfonic acid" OR "1-perfluorobutanefluoro-1-sulfonic acid" OR "nonafluoro-1-butanefluoro-1-sulfonic acid" OR "nonafluorobutanefluoro-1-sulfonic acid" OR "perfluorobutanefluoro-1-sulfonic acid" OR "1 1 2 2 3 3 4 4 4-nonafluorobutane-1-sulphonic acid" OR "perfluorobutane sulfonic acid" OR "perfluorobutanefluoro-1-sulfonate" OR "1-butanefluoro-1-sulfonic acid 1 1 2 2 3 3 4 4 4-nonafluoro-" OR "1-butanefluoro-1-sulfonic acid nonafluoro-" OR "perfluoro-1-butanefluoro-1-sulfonate" OR "perfluorobutylsulfonate" OR "eftop fbsa" OR ( pfsb AND ( fluorocarbon* OR fluorotelomer* OR polyfluoro* OR perfluoro* OR perfluorinated OR fluorinated OR pfas OR pfos OR pfoa ) ) ) AND ( ANEUPL [org] OR BIOSIS [org] OR CIS [org] OR DART [org] OR EMIC [org] OR EPIDEM [org] OR HEEP [org] OR HMTc [org] OR IPA [org] OR RISKLINE [org] OR MTGABS [org] OR NIOSH [org] OR NTIS [org] OR PESTAB [org] OR PPBIB [org] ) AND NOT PubMed [org] AND NOT pubdart [org]                         |
| <b>PFDA</b>                                                                                                                                                                          |                                                                                                                                                                                                                                                                                                                                                                                                                                                                                                                                                                                                                                                                                                                                                                                                                                                                                                                                                                                                                                                                                         |
| HERO page (accessed 1 June 2020):<br><a href="https://hero.epa.gov/hero/index.cfm/project/page/project_id/2614">https://hero.epa.gov/hero/index.cfm/project/page/project_id/2614</a> |                                                                                                                                                                                                                                                                                                                                                                                                                                                                                                                                                                                                                                                                                                                                                                                                                                                                                                                                                                                                                                                                                         |
| Web of Science                                                                                                                                                                       | TS="PFDeA" OR TS="PFDCa" OR TS="Ndfda" OR TS="Nonadecafluoro-n-decanoic acid" OR TS="Nonadecafluorodecanoic acid" OR TS="Perfluoro-n-decanoic acid" OR TS="Perfluorodecanoic acid" OR TS="2,2,3,3,4,4,5,5,6,6,7,7,8,8,9,9,10,10,10-nonadecafluoro-Decanoic acid" OR TS="Decanoic acid, 2,2,3,3,4,4,5,5,6,6,7,7,8,8,9,9,10,10,10-nonadecafluoro-" OR TS="Decanoic acid, nonadecafluoro-" OR TS="Perfluorodecanoate" OR (TS=PFDA AND TS=(fluorocarbon* OR fluorotelomer* OR polyfluoro* OR perfluoro-* OR perfluoroa* OR perfluorob* OR perfluoroc* OR perfluorod* OR perfluoroeh* OR perfluoroh* OR perfluoron* OR perfluoroo* OR perfluorop* OR perfluorou* OR perfluorinated OR fluorinated)) OR (TS=PFDA AND TS=(fluorocarbon* OR fluorotelomer* OR polyfluoro* OR perfluoro-* OR perfluoroa* OR perfluorob* OR perfluoroc* OR perfluorod* OR perfluoroeh* OR perfluoroh* OR perfluoron* OR perfluoroo* OR perfluorop* OR perfluorou* OR perfluorinated OR fluorinated OR PFAS OR PFOS OR PFOA                                                                                        |
| PubMed                                                                                                                                                                               | 335-76-2[rn] OR "Ndfda"[tw] OR "Nonadecafluoro-n-decanoic acid"[tw] OR "Nonadecafluorodecanoic acid"[tw] OR "Perfluoro-n-decanoic acid"[tw] OR "Perfluorodecanoic acid"[tw] OR "2,2,3,3,4,4,5,5,6,6,7,7,8,8,9,9,10,10,10-nonadecafluoro-Decanoic acid"[tw] OR "Decanoic acid, 2,2,3,3,4,4,5,5,6,6,7,7,8,8,9,9,10,10,10-nonadecafluoro-"[tw] OR "Decanoic acid, nonadecafluoro-"[tw] OR "Perfluorodecanoate"[tw] OR "PFDeA"[tw] OR "PFDCa"[tw] OR ("PFDA"[tw] AND (fluorocarbon*[tw] OR fluorotelomer*[tw] OR polyfluoro*[tw] OR perfluoro-*[tw] OR perfluoroa*[tw] OR perfluorob*[tw] OR perfluoroc*[tw] OR perfluorod*[tw] OR perfluoroeh*[tw] OR perfluoroh*[tw] OR perfluoron*[tw] OR perfluoroo*[tw] OR perfluorop*[tw] OR perfluorou*[tw] OR perfluorinated[tw] OR fluorinated[tw] OR PFAS[tw] OR PFOS[tw] OR PFOA[tw]))                                                                                                                                                                                                                                                           |
| ToxLine                                                                                                                                                                              | (( 335-76-2 [rn] OR "2,2,3,3,4,4,5,5,6,6,7,7,8,8,9,9,10,10,10-nonadecafluorodecanoic acid" OR "2,2,3,3,4,4,5,5,6,6,7,7,8,8,9,9,10,10,10-nonadecafluoro-decanoic acid" OR "decanoic acid 2,2,3,3,4,4,5,5,6,6,7,7,8,8,9,9,10,10,10-nonadecafluoro-" OR "decanoic acid nonadecafluoro-" OR "nonadecafluoro-n-decanoic acid" OR "nonadecafluorodecanoic acid" OR "perfluoro-1-nonanecarboxylic acid" OR "perfluoro-n-decanoic acid" OR "perfluorocapric acid" OR "perfluorodecanoate" OR "perfluorodecanoic acid" OR "ndfda" OR "PFDeA" OR "PFDCa" OR ( pfdA AND ( fluorocarbon* OR fluorotelomer* OR polyfluoro* OR perfluoro* OR perfluorinated OR fluorinated OR pfas OR pfos OR pfoa ) ) ) AND ( ANEUPL [org] OR BIOSIS [org] OR CIS [org] OR DART [org] OR EMIC [org] OR EPIDEM [org] OR HEEP [org] OR HMTc [org] OR IPA [org] OR RISKLINE [org] OR MTGABS [org] OR NIOSH [org] OR NTIS [org] OR PESTAB [org] OR PPBIB [org] ) AND NOT PubMed [org] AND NOT pubdart [org]                                                                                                              |

**Database Search String**

**PFHxA**

HERO page (accessed 27 May 2020):

[https://hero.epa.gov/hero/index.cfm/project/page/project\\_id/2628](https://hero.epa.gov/hero/index.cfm/project/page/project_id/2628)

Web of Science ((TS="2,2,3,3,4,4,5,5,6,6,6-undecafluorohexanoic acid" OR TS="2,2,3,3,4,4,5,5,6,6,6-undecafluoro-hexanoic acid" OR TS="hexanoic acid, 2,2,3,3,4,4,5,5,6,6,6-undecafluoro-" OR TS="hexanoic acid, undecafluoro-" OR TS="perfluorohexanoic acid" OR TS="perfluoro-1-pentanecarboxylic acid" OR TS="perfluorocaproic acid" OR TS="perfluorohexanoate" OR TS="perfluorohexanoic acid" OR TS="undecafluoro-1-hexanoic acid" OR TS="undecafluorocaproic acid" OR TS="undecafluorohexanoic acid" OR TS="PFHxA"))

PubMed ((307-24-4[rn] OR "2,2,3,3,4,4,5,5,6,6,6-undecafluorohexanoic acid"[tw] OR "2,2,3,3,4,4,5,5,6,6,6-undecafluoro-hexanoic acid"[tw] OR "hexanoic acid, 2,2,3,3,4,4,5,5,6,6,6-undecafluoro-"[tw] OR "hexanoic acid, undecafluoro-"[tw] OR "perfluorohexanoic acid"[tw] OR "perfluoro-1-pentanecarboxylic acid"[tw] OR "perfluorocaproic acid"[tw] OR "perfluorohexanoate"[tw] OR "perfluorohexanoic acid"[tw] OR "undecafluoro-1-hexanoic acid"[tw] OR "undecafluorocaproic acid"[tw] OR "undecafluorohexanoic acid"[tw] OR "PFHxA"[tw]))

ToxLine/ToxNet @AND+@OR+("2,2,3,3,4,4,5,5,6,6,6-undecafluorohexanoic+acid"+"2,2,3,3,4,4,5,5,6,6,6-undecafluoro-hexanoic+acid"+"hexanoic+acid+2,2,3,3,4,4,5,5,6,6,6-undecafluoro-"+"hexanoic+acid+undecafluoro-"+"perfluorohexanoic+acid"+"perfluoro-1-pentanecarboxylic+acid"+"perfluorocaproic+acid"+"perfluorohexanoate"+"perfluorohexanoic acid"+"undecafluoro-1-hexanoic+acid"+"undecafluorocaproic+acid"+"undecafluorohexanoic+acid"+"pfxa"+@TERM+@rn+(307+24+4)+@NOT+@org+"nih+reporter"

**PFHxS**

HERO page (accessed 1 June 2020):

[https://hero.epa.gov/hero/index.cfm/project/page/project\\_id/2630](https://hero.epa.gov/hero/index.cfm/project/page/project_id/2630)

Web of Science TS="1,1,2,2,3,3,4,4,5,5,6,6,6-Tridecafluorohexane-1-sulfonic acid" OR TS="1,1,2,2,3,3,4,4,5,5,6,6,6-tridecafluoro-1-Hexanesulfonic acid" OR TS="1-Hexanesulfonic acid, 1,1,2,2,3,3,4,4,5,5,6,6,6-tridecafluoro-" OR TS="1-Hexanesulfonic acid, tridecafluoro-" OR TS="1-Perfluorohexanesulfonic acid" OR TS="Perfluoro-1-hexanesulfonate" OR TS="Perfluorohexane sulfonic acid" OR TS="Perfluorohexane-1-sulphonic acid" OR TS="Perfluorohexanesulfonate" OR TS="Perfluorohexanesulfonic acid" OR TS="Perfluorohexylsulfonate" OR TS="Tridecafluorohexanesulfonic acid" OR TS="tridecafluoro-1-Hexanesulfonic acid" OR TS="PFHxS"

PubMed 108427-53-8[rn] OR 355-46-4[rn] OR "1,1,2,2,3,3,4,4,5,5,6,6,6-Tridecafluorohexane-1-sulfonic acid"[tw] OR "1,1,2,2,3,3,4,4,5,5,6,6,6-tridecafluoro-1-Hexanesulfonic acid"[tw] OR "1-Hexanesulfonic acid, 1,1,2,2,3,3,4,4,5,5,6,6,6-tridecafluoro-"[tw] OR "1-Hexanesulfonic acid, tridecafluoro-"[tw] OR "1-Perfluorohexanesulfonic acid"[tw] OR "Perfluoro-1-hexanesulfonate"[tw] OR "Perfluorohexane sulfonic acid"[tw] OR "Perfluorohexane-1-sulphonic acid"[tw] OR "Perfluorohexanesulfonate"[tw] OR "Perfluorohexanesulfonic acid"[tw] OR "Perfluorohexylsulfonate"[tw] OR "Tridecafluorohexanesulfonic acid"[tw] OR "tridecafluoro-1-Hexanesulfonic acid"[tw] OR "PFHxS"[tw]

ToxLine/ToxNet ( 108427-53-8[rn] OR 355-46-4[rn] OR "1,1,2,2,3,3,4,4,5,5,6,6,6-Tridecafluorohexane-1-sulfonic acid" OR "1,1,2,2,3,3,4,4,5,5,6,6,6-tridecafluoro-1-Hexanesulfonic acid" OR "1-Hexanesulfonic acid, 1,1,2,2,3,3,4,4,5,5,6,6,6-tridecafluoro-" OR "1-Hexanesulfonic acid, tridecafluoro-" OR "1-Perfluorohexanesulfonic acid" OR "Perfluoro-1-hexanesulfonate" OR "Perfluorohexane sulfonic acid" OR "Perfluorohexane-1-sulphonic acid" OR "Perfluorohexanesulfonate" OR "Perfluorohexanesulfonic acid" OR "Perfluorohexylsulfonate" OR "Tridecafluorohexanesulfonic acid" OR "tridecafluoro-1-Hexanesulfonic acid" OR "PFHxS" ) AND ( ANEUPL [org] OR BIOSIS [org] OR CIS [org] OR DART [org] OR EMIC [org] OR EPIDEM [org] OR HEEP [org] OR HMTc [org] OR IPA [org] OR RISKLINE [org] OR MTGABS [org] OR NIOSH [org] OR NTIS [org] OR PESTAB [org] OR PPBIB [org] ) [not] PubMed [org] [not] pubdart [org]

**PFNA**

HERO page (accessed 1 June 2020):

[https://hero.epa.gov/hero/index.cfm/project/page/project\\_id/2633](https://hero.epa.gov/hero/index.cfm/project/page/project_id/2633)

Web of Science ((TS=PFNA OR TS="C 1800") AND TS=(fluorocarbon\* OR fluorotelomer\* OR polyfluoro\* OR perfluoro-\* OR perfluoroa\* OR perfluorob\* OR perfluoroc\* OR perfluorod\* OR perfluoroee\* OR perfluoroh\* OR perfluoron\* OR perfluoroo\* OR perfluorop\* OR perfluoros\* OR perfluorou\* OR perfluorinated OR fluorinated OR PFAS OR PFOS OR PFOA)) OR TS="2,2,3,3,4,4,5,5,6,6,7,7,8,8,9,9,9-heptadecafluorononanoic acid" OR TS="Nonanoic acid, 2,2,3,3,4,4,5,5,6,6,7,7,8,8,9,9,9-heptadecafluoro-" OR TS="Nonanoic acid, heptadecafluoro-" OR TS="Perfluoro-n-nonanoic acid" OR TS="Perfluorononanoic acid" OR TS="Perfluorononanoate" OR TS="Perfluorononanoic acid" OR TS="Perfluorononanoic acid" OR TS="Perfluoropelargonic acid" OR TS="heptadecafluorononanoic acid"

| Database                                                                                                                                                                                                         | Search String                                                                                                                                                                                                                                                                                                                                                                                                                                                                                                                                                                                                                                                                                                                                                                                                                                                                                                                                                                                                                                                                                                                                                                                                                                                                                                                                                                                                                                                                                                                           |
|------------------------------------------------------------------------------------------------------------------------------------------------------------------------------------------------------------------|-----------------------------------------------------------------------------------------------------------------------------------------------------------------------------------------------------------------------------------------------------------------------------------------------------------------------------------------------------------------------------------------------------------------------------------------------------------------------------------------------------------------------------------------------------------------------------------------------------------------------------------------------------------------------------------------------------------------------------------------------------------------------------------------------------------------------------------------------------------------------------------------------------------------------------------------------------------------------------------------------------------------------------------------------------------------------------------------------------------------------------------------------------------------------------------------------------------------------------------------------------------------------------------------------------------------------------------------------------------------------------------------------------------------------------------------------------------------------------------------------------------------------------------------|
| PubMed                                                                                                                                                                                                           | "375-95-1"[rn] OR "2,2,3,3,4,4,5,5,6,6,7,7,8,8,9,9,9-heptadecafluorononanoic acid"[tw] OR "Nonanoic acid, 2,2,3,3,4,4,5,5,6,6,7,7,8,8,9,9,9-heptadecafluoro-"[tw] OR "Nonanoic acid, heptadecafluoro-"[tw] OR "Perfluoro-n-nonanoic acid"[tw] OR "Perfluorononan-1-oic acid"[tw] OR "Perfluorononanoate"[tw] OR "Perfluorononanoic acid"[tw] OR "Perfluorononanoic acid"[tw] OR "Perfluoropelargonic acid"[tw] OR "heptadecafluorononanoic acid"[tw] OR ("PFNA"[tw] OR "C 1800"[tw]) AND (fluorocarbon*[tw] OR fluorotelomer*[tw] OR polyfluoro*[tw] OR perfluoro-*[tw] OR perfluoroa*[tw] OR perfluorob*[tw] OR perfluoroc*[tw] OR perfluorod*[tw] OR perfluoroe*[tw] OR perfluoroh*[tw] OR perfluoron*[tw] OR perfluoroo*[tw] OR perfluorop*[tw] OR perfluoros*[tw] OR perfluorou*[tw] OR perfluorinated[tw] OR fluorinated[tw] OR PFAS[tw] OR PFOS[tw] OR PFOA[tw]))                                                                                                                                                                                                                                                                                                                                                                                                                                                                                                                                                                                                                                                                 |
| ToxLine/<br>ToxNet                                                                                                                                                                                               | (( pfna OR "c 1800" ) AND ( fluorocarbon* OR fluorotelomer* OR polyfluoro* OR perfluoro* OR perfluorinated OR fluorinated OR pfas OR pfos OR pfoa ) OR "375-95-1" [rn] OR "2,2,3,3,4,4,5,5,6,6,7,7,8,8,9,9,9-heptadecafluorononanoic acid" OR "nonanoic acid 2,2,3,3,4,4,5,5,6,6,7,7,8,8,9,9,9-heptadecafluoro-" OR "nonanoic acid heptadecafluoro-" OR "perfluoro-n-nonanoic acid" OR "perfluorononan-1-oic acid" OR "perfluorononanoate" OR "perfluorononanoic acid" OR "perfluorononanoic acid" OR "perfluoropelargonic acid" OR "heptadecafluorononanoic acid" ) AND ( ANEURL [org] OR BIOSIS [org] OR CIS [org] OR DART [org] OR EMIC [org] OR EPIDEM [org] OR HEEP [org] OR HMTC [org] OR IPA [org] OR RISKLINE [org] OR MTGABS [org] OR NIOSH [org] OR NTIS [org] OR PESTAB [org] OR PPBIB [org] ) AND NOT PubMed [org] AND NOT pubdart [org]                                                                                                                                                                                                                                                                                                                                                                                                                                                                                                                                                                                                                                                                                    |
| <b>PFDaA</b>                                                                                                                                                                                                     |                                                                                                                                                                                                                                                                                                                                                                                                                                                                                                                                                                                                                                                                                                                                                                                                                                                                                                                                                                                                                                                                                                                                                                                                                                                                                                                                                                                                                                                                                                                                         |
| HERO page <sup>a,b</sup> (accessed 15 June 2021):<br><a href="https://heronet.epa.gov/heronet/index.cfm/project/page/project_id/3006">https://heronet.epa.gov/heronet/index.cfm/project/page/project_id/3006</a> |                                                                                                                                                                                                                                                                                                                                                                                                                                                                                                                                                                                                                                                                                                                                                                                                                                                                                                                                                                                                                                                                                                                                                                                                                                                                                                                                                                                                                                                                                                                                         |
| Web of<br>Science                                                                                                                                                                                                | TS="307-55-1" OR "2,2,3,3,4,4,5,5,6,6,7,7,8,8,9,9,10,10,11,11,11-Tricosafuorododecanoic acid" OR "2,2,3,3,4,4,5,5,6,6,7,7,8,8,9,9,10,10,11,11,12,12-tricosafuoro-Dodecanoic acid" OR "2,2,3,3,4,4,5,5,6,6,7,7,8,8,9,9,10,10,11,11,12,12-Tricosafuorododecanoic acid" OR "Dodecanoic acid, 2,2,3,3,4,4,5,5,6,6,7,7,8,8,9,9,10,10,11,11,12,12-tricosafuoro-" OR "Dodecanoic acid, tricosafuoro-" OR "Perfluoro-n-Dodecanoic acid" OR "Perfluorododecanoate" OR "Perfluorododecanoic acid" OR "Perfluorolauric acid" OR "Tricosafuorododecanoic acid" OR ((PFDaA OR PFDaDA) AND (fluorocarbon* OR fluorotelomer* OR polyfluoro* OR perfluoro-* OR perfluoroa* OR perfluorob* OR perfluoroc* OR perfluorod* OR perfluoroe* OR perfluoroh* OR perfluoron* OR perfluoroo* OR perfluorop* OR perfluoros* OR perfluorou* OR perfluorinated OR fluorinated OR PFAS OR PFOS OR PFOA))                                                                                                                                                                                                                                                                                                                                                                                                                                                                                                                                                                                                                                                             |
| PubMed                                                                                                                                                                                                           | 307-55-1[rn] OR "2,2,3,3,4,4,5,5,6,6,7,7,8,8,9,9,10,10,11,11,11-Tricosafuorododecanoic acid"[tw] OR "2,2,3,3,4,4,5,5,6,6,7,7,8,8,9,9,10,10,11,11,12,12-tricosafuoro-Dodecanoic acid"[tw] OR "2,2,3,3,4,4,5,5,6,6,7,7,8,8,9,9,10,10,11,11,12,12-Tricosafuorododecanoic acid"[tw] OR "Dodecanoic acid, 2,2,3,3,4,4,5,5,6,6,7,7,8,8,9,9,10,10,11,11,12,12-tricosafuoro-"[tw] OR "Dodecanoic acid, tricosafuoro-"[tw] OR "Perfluoro-n-Dodecanoic acid"[tw] OR "Perfluorododecanoate"[tw] OR "Perfluorododecanoic acid"[tw] OR "Perfluorolauric acid"[tw] OR "Tricosafuorododecanoic acid"[tw] OR ((PFDaA[tw] OR PFDaDA[tw]) AND (fluorocarbon*[tw] OR fluorotelomer*[tw] OR polyfluoro*[tw] OR perfluoro-*[tw] OR perfluoroa*[tw] OR perfluorob*[tw] OR perfluoroc*[tw] OR perfluorod*[tw] OR perfluoroe*[tw] OR perfluoroh*[tw] OR perfluoron*[tw] OR perfluoroo*[tw] OR perfluorop*[tw] OR perfluoros*[tw] OR perfluorou*[tw] OR perfluorinated[tw] OR fluorinated[tw] OR PFAS[tw] OR PFOS[tw] OR PFOA[tw]))                                                                                                                                                                                                                                                                                                                                                                                                                                                                                                                              |
| ToxLine/<br>ToxNet                                                                                                                                                                                               | <i>Did not search</i>                                                                                                                                                                                                                                                                                                                                                                                                                                                                                                                                                                                                                                                                                                                                                                                                                                                                                                                                                                                                                                                                                                                                                                                                                                                                                                                                                                                                                                                                                                                   |
| <b>PFUdA</b>                                                                                                                                                                                                     |                                                                                                                                                                                                                                                                                                                                                                                                                                                                                                                                                                                                                                                                                                                                                                                                                                                                                                                                                                                                                                                                                                                                                                                                                                                                                                                                                                                                                                                                                                                                         |
| HERO page <sup>a</sup> (accessed 15 June 2021):<br><a href="https://hero.epa.gov/hero/index.cfm/project/page/project_id/2826">https://hero.epa.gov/hero/index.cfm/project/page/project_id/2826</a>               |                                                                                                                                                                                                                                                                                                                                                                                                                                                                                                                                                                                                                                                                                                                                                                                                                                                                                                                                                                                                                                                                                                                                                                                                                                                                                                                                                                                                                                                                                                                                         |
| Web of<br>Science                                                                                                                                                                                                | (TS="2,2,3,3,4,4,5,5,6,6,7,7,8,8,9,9,10,10,10-Heneicosafuoroundecanoic acid" OR TS="2,2,3,3,4,4,5,5,6,6,7,7,8,8,9,9,10,10,11,11,11-Heneicosafuoroundecanoic acid" OR TS="acide heneicosafuoroundecanoique" OR TS="acido heneicosafuoroundecanoico" OR TS="EINECS 218-165-4" OR TS="Heneicosafuoroundecanoic acid" OR TS="Henicosafuoroundecansauere" OR TS="Perfluoro-n-undecanoic acid" OR TS="Perfluoroundecanoic acid" OR TS="Perfluoroundecanoic acidPFUdA" OR TS="Perfluoroundecylic acid" OR TS="PFUdA" OR TS="PFUnA" OR TS="PFUnDA" OR TS="Undecanoic acid, 2,2,3,3,4,4,5,5,6,6,7,7,8,8,9,9,10,10,11,11,11-heneicosafuoro-" OR TS="Undecanoic acid, heneicosafuoro-") AND (TS="ADME" OR TS="neurolog*" OR TS="development*" OR TS="respirator*" OR TS="ocular" OR TS="sensory" OR TS="hematolog*" OR TS="nutrition*" OR TS="metabol*" OR TS="musculoskelet*" OR TS="cancer" OR TS="mortality" OR TS="gastrointest*" OR TS="skin" OR TS="connective tissue" OR TS="derm*" OR TS="endocrine" OR TS="cardiovascular" OR TS="reproduct*" OR TS="renal" OR TS="hepatic" OR TS="PBPk" OR TS="human health" OR TS="health" OR TS="human" OR TS="epidemiology" OR TS="child*" OR TS="teenager*" OR TS="adolescenc*" OR TS="pregnan*" OR TS="adult*" OR TS="general population" OR TS="population" OR TS="acute" OR TS="intermittent" OR TS="subchronic" OR TS="chronic" OR TS="heart" OR TS="liver" OR TS="nerv*" OR TS="dermal" OR TS="lung" OR TS="blood" OR TS="serum" OR TS="birth" OR TS="pulmonary" OR TS="disease" OR TS="death") |

| Database                                                                                                                                                                                           | Search String                                                                                                                                                                                                                                                                                                                                                                                                                                                                                                                                                                                                                                                                                                                                                                                                                                                                                                                                                                                                                                                                                                                                                                                                                                                                                                                                                                                 |
|----------------------------------------------------------------------------------------------------------------------------------------------------------------------------------------------------|-----------------------------------------------------------------------------------------------------------------------------------------------------------------------------------------------------------------------------------------------------------------------------------------------------------------------------------------------------------------------------------------------------------------------------------------------------------------------------------------------------------------------------------------------------------------------------------------------------------------------------------------------------------------------------------------------------------------------------------------------------------------------------------------------------------------------------------------------------------------------------------------------------------------------------------------------------------------------------------------------------------------------------------------------------------------------------------------------------------------------------------------------------------------------------------------------------------------------------------------------------------------------------------------------------------------------------------------------------------------------------------------------|
| PubMed                                                                                                                                                                                             | ("110961-38-1"[rn] OR "2,2,3,3,4,4,5,5,6,6,7,7,8,8,9,9,10,10,10- Heneicosaflluoroundecanoic acid"[tw] OR "2,2,3,3,4,4,5,5,6,6,7,7,8,8,9,9,10,10,11,11,11-Heneicosaflluoroundecanoic acid"[tw] OR "2058-94-8"[rn] OR "acide heneicosaflluoroundecanoique"[tw] OR "acido heneicosaflluoroundecanoico"[tw] OR "EINECS 218-165-4"[tw] OR "Heneicosaflluoroundecanoic acid"[tw] OR "Heneicosaflluoroundecansauere"[tw] OR "Perfluoro-n-undecanoic acid"[tw] OR "Perfluoroundecanoic acid"[tw] OR "Perfluoroundecanoic acidPFUdA"[tw] OR "Perfluoroundecylic acid"[tw] OR "PFUdA"[tw] OR "PFUnA"[tw] OR "PFUnDA"[tw] OR "Undecanoic acid, 2,2,3,3,4,4,5,5,6,6,7,7,8,8,9,9,10,10,11,11,11-heneicosaflluoro-"[tw] OR "Undecanoic acid, heneicosaflluoro-"[tw])                                                                                                                                                                                                                                                                                                                                                                                                                                                                                                                                                                                                                                        |
| ToxLine/<br>ToxNet                                                                                                                                                                                 | @AND+@OR+("2+2+3+3+4+4+5+5+6+6+7+7+8+8+9+9+10+10+10+Heneicosaflluoroundecanoic+acid"+"2+2+3+3+4+4+5+5+6+6+7+7+8+8+9+9+10+10+11+11+11+Heneicosaflluoroundecanoic+acid"+"acide+heneicosaflluoroundecanoique"+"acido+heneicosaflluoroundecanoico"+"EINECS+218+165+4"+"Heneicosaflluoroundecanoic+acid"+"Heneicosaflluoroundecansauere"+"Perfluoro+n+undecanoic+acid"+"Perfluoroundecanoic+acid"+"Perfluoroundecanoic+acidPFUdA"+"Perfluoroundecylic+acid"+PFUdA+PFUnA+PFUnDA+"Undecanoic+acid+heneicosaflluoro"+@TERM+@rn+110961-38-1+@TERM+@rn+2058-94-8)+@NOT+@org+pubmed+pubdart+nih+reporter"                                                                                                                                                                                                                                                                                                                                                                                                                                                                                                                                                                                                                                                                                                                                                                                                |
| <b>PFHpA</b>                                                                                                                                                                                       |                                                                                                                                                                                                                                                                                                                                                                                                                                                                                                                                                                                                                                                                                                                                                                                                                                                                                                                                                                                                                                                                                                                                                                                                                                                                                                                                                                                               |
| HERO page <sup>a</sup> (accessed 15 June 2021):<br><a href="https://hero.epa.gov/hero/index.cfm/project/page/project_id/2826">https://hero.epa.gov/hero/index.cfm/project/page/project_id/2826</a> |                                                                                                                                                                                                                                                                                                                                                                                                                                                                                                                                                                                                                                                                                                                                                                                                                                                                                                                                                                                                                                                                                                                                                                                                                                                                                                                                                                                               |
| Web of Science                                                                                                                                                                                     | (TS="2,2,3,3,4,4,5,5,6,6,7,7,7-Tridecafluoroheptanoic acid" OR TS="Acide perfluoroheptanoique" OR TS="acido perfluoroheptanoico" OR TS="EC 206- 798-9" OR TS="EINECS 206-798-9" OR TS="Heptanoic acid, 2,2,3,3,4,4,5,5,6, 6,7,7,7-tridecafluoro-" OR TS="Heptanoic acid, tridecafluoro-" OR TS="Perfluorheptansauere" OR TS="Perfluoro-n-heptanoic acid" OR TS="Perfluoroenanthic acid" OR TS="Perfluoroheptanoic acid" OR TS="PFHpA" OR TS="Tridecafluoro-1-heptanoic acid" OR TS="Tridecafluoroheptanoic acid" OR TS="375-85-9") AND (TS="ADME" OR TS="neurolog*" OR TS="development*" OR TS="respirator*" OR TS="ocular" OR TS="sensory" OR TS="hematolog*" OR TS="nutrition*" OR TS="metabol*" OR TS="musculoskelet*" OR TS="cancer" OR TS="mortality" OR TS="gastrointest*" OR TS="skin" OR TS="connective tissue" OR TS="derm*" OR TS="endocrine" OR TS="cardiovascular" OR TS="reproduct*" OR TS="renal" OR TS="hepatic" OR TS="PBPK" OR TS="human health" OR TS="health" OR TS="human" OR TS="epidemiology" OR TS="child*" OR TS="teenager*" OR TS="adolescenc*" OR TS="pregnan*" OR TS="adult*" OR TS="general population" OR TS="population" OR TS="acute" OR TS="intermittent" OR TS="subchronic" OR TS="chronic" OR TS="heart" OR TS="liver" OR TS="nerv*" OR TS="dermal" OR TS="lung" OR TS="blood" OR TS="serum" OR TS="birth" OR TS="pulmonary" OR TS="disease" OR TS="death") |
| PubMed                                                                                                                                                                                             | ("2,2,3,3,4,4,5,5,6,6,7,7,7-Tridecafluoroheptanoic acid"[tw] OR "Acide perfluoroheptanoique"[tw] OR "acido perfluoroheptanoico"[tw] OR "EC 206-798-9"[tw] OR "EINECS 206-798-9"[tw] OR "Heptanoic acid, 2,2,3,3,4,4, 5,5,6,6,7,7,7-tridecafluoro-"[tw] OR "Heptanoic acid, tridecafluoro-"[tw] OR "Perfluorheptansauere"[tw] OR "Perfluoro-n-heptanoic acid"[tw] OR "Perfluoroenanthic acid"[tw] OR "Perfluoroheptanoic acid"[tw] OR "PFHpA"[tw] OR "Tridecafluoro-1-heptanoic acid"[tw] OR "Tridecafluoroheptanoic acid"[tw] OR 375-85-9[rn])                                                                                                                                                                                                                                                                                                                                                                                                                                                                                                                                                                                                                                                                                                                                                                                                                                                |
| ToxLine/<br>ToxNet                                                                                                                                                                                 | @SYNO+@AND+@OR+("2,2,3,3,4,4,5,5,6,6,7,7,7-Tridecafluoroheptanoic+acid"+"Acide+perfluoroheptanoique"+"acido+perfluoroheptanoico"+"EC+206-798-9"+"EINECS+206-798-9"+"Heptanoic+acid,+2,2,3,3,4,4,5,5,6,6,7,7,7-tridecafluoro- "+"Heptanoic+acid,+tridecafluoro- "+"Perfluorheptansauere"+"Perfluoro-nheptanoic+acid"+"Perfluoroenanthic+acid"+"Perfluoroheptanoic+acid"+PFHpA+"Tridecafluoro-1- heptanoic+acid"+"Tridecafluoroheptanoic+acid"+@TERM+@rn+375-85-9)+@NOT+@org+pubmed+pubdart+nih                                                                                                                                                                                                                                                                                                                                                                                                                                                                                                                                                                                                                                                                                                                                                                                                                                                                                                 |
| <b>PFPeA</b>                                                                                                                                                                                       |                                                                                                                                                                                                                                                                                                                                                                                                                                                                                                                                                                                                                                                                                                                                                                                                                                                                                                                                                                                                                                                                                                                                                                                                                                                                                                                                                                                               |
| HERO page <sup>a</sup> (accessed 15 June 2021):<br><a href="https://hero.epa.gov/hero/index.cfm/project/page/project_id/2826">https://hero.epa.gov/hero/index.cfm/project/page/project_id/2826</a> |                                                                                                                                                                                                                                                                                                                                                                                                                                                                                                                                                                                                                                                                                                                                                                                                                                                                                                                                                                                                                                                                                                                                                                                                                                                                                                                                                                                               |
| Web of Science                                                                                                                                                                                     | ((TS="Perfluoropentanoic acid" OR TS="Nonaflluoropentanoic acid" OR TS="2706-90-3" OR TS="PFPeA" OR TS="Nonaflluoro-1- pentanoic acid") AND (TS="ADME" OR TS="neurolog*" OR TS="development*" OR TS="respirator*" OR TS="ocular" OR TS="sensory" OR TS="hematolog*" OR TS="nutrition*" OR TS="metabol*" OR TS="musculoskelet*" OR TS="cancer" OR TS="mortality" OR TS="gastrointest*" OR TS="skin" OR TS="connective tissue" OR TS="derm*" OR TS="endocrine" OR TS="cardiovascular" OR TS="reproduct*" OR TS="renal" OR TS="hepatic" OR TS="PBPK" OR TS="human health" OR TS="health" OR TS="human" OR TS="epidemiology" OR TS="child*" OR TS="teenager*" OR TS="adolescenc*" OR TS="pregnan*" OR TS="adult*" OR TS="general population" OR TS="population" OR TS="acute" OR TS="intermittent" OR TS="subchronic" OR TS="chronic" OR TS="heart" OR TS="liver" OR TS="nerv*" OR TS="dermal" OR TS="lung" OR TS="blood" OR TS="serum" OR TS="birth" OR TS="pulmonary" OR TS="disease" OR TS="death")) AND PY=1900-2019                                                                                                                                                                                                                                                                                                                                                                          |
| PubMed                                                                                                                                                                                             | ("Perfluoropentanoic acid"[tw] OR "Nonaflluoropentanoic acid"[tw] OR "2706-90-3"[tw] OR "PFPeA"[tw] OR "Nonaflluoro-1-pentanoic acid"[tw])                                                                                                                                                                                                                                                                                                                                                                                                                                                                                                                                                                                                                                                                                                                                                                                                                                                                                                                                                                                                                                                                                                                                                                                                                                                    |
| ToxLine/<br>ToxNet                                                                                                                                                                                 | @AND+@OR+("Perfluoropentanoic acid"+"Nonaflluoropentanoic acid"+"PFPeA"+"Nonaflluoro-1-pentanoic acid"+@TERM+@rn+2706-90-3)+@RANGE+yr+1900+2019+@NOT+@org+pubmed+pubdart+nih                                                                                                                                                                                                                                                                                                                                                                                                                                                                                                                                                                                                                                                                                                                                                                                                                                                                                                                                                                                                                                                                                                                                                                                                                  |



**Database Search String**

**PFDS**

HERO page <sup>a,b</sup> (accessed 15 June 2021):

[https://heronet.epa.gov/heronet/index.cfm/project/page/project\\_id/3006](https://heronet.epa.gov/heronet/index.cfm/project/page/project_id/3006)

**Web of Science** TS="335-77-3" OR "1,1,2,2,3,3,4,4,5,5,6,6,7,7,8,8,9,9,10,10-heneicosafuoro-1-Decanesulfonic acid" OR "1,1,2,2,3,3,4,4,5,5,6,6,7,7,8,8,9,9,10,10-Heneicosafuorodecane-1-sulfonic acid" OR "1-Decanesulfonic acid, 1,1,2,2,3,3,4,4,5,5,6,6,7,7,8,8,9,9,10,10-heneicosafuoro-" OR "1-Decanesulfonic acid, heneicosafuoro-" OR "Heneicosafuoro-1-decanesulfonic acid" OR "Heneicosafuorodecanesulphonic acid" OR "Perfluoro-1-decanesulfonate" OR "Perfluorodecane sulfonic acid" OR "Perfluorodecanesulfonate" OR "Perfluorodecanesulfonic acid" OR "Perfluorodecylsulfonate" OR ("PFDS" AND (fluorocarbon\* OR fluorotelomer\* OR polyfluoro\* OR perfluoro-\* OR perfluoroa\* OR perfluorob\* OR perfluoroc\* OR perfluorod\* OR perfluoroe\* OR perfluoroh\* OR perfluoron\* OR perfluoroo\* OR perfluorop\* OR perfluoros\* OR perfluorou\* OR perfluorinated OR fluorinated OR PFAS OR PFOS OR PFOA)) OR ("1,1,2,2,3,3,4,4,5,5,6,6,7,7,8,8,9,9,10,10-heneicosafuoro-1-Decanesulfonic" OR "1,1,2,2,3,3,4,4,5,5,6,6,7,7,8,8,9,9,10,10-Heneicosafuorodecane-1-sulfonic" OR "Heneicosafuoro-1-decanesulfonic" OR "Heneicosafuorodecanesulphonic" OR "Perfluorodecane sulfonic" OR "Perfluorodecanesulfonic") AND (acid[tiab] OR acids[tiab]))

**PubMed** 335-77-3[rn] OR "1,1,2,2,3,3,4,4,5,5,6,6,7,7,8,8,9,9,10,10-heneicosafuoro-1-Decanesulfonic acid"[tw] OR "1,1,2,2,3,3,4,4,5,5,6,6,7,7,8,8,9,9,10,10-Heneicosafuorodecane-1-sulfonic acid"[tw] OR "1-Decanesulfonic acid, 1,1,2,2,3,3,4,4,5,5,6,6,7,7,8,8,9,9,10,10-heneicosafuoro-"[tw] OR "1-Decanesulfonic acid, heneicosafuoro-"[tw] OR "Heneicosafuoro-1-decanesulfonic acid"[tw] OR "Heneicosafuorodecanesulphonic acid"[tw] OR "Perfluoro-1-decanesulfonate"[tw] OR "Perfluorodecane sulfonic acid"[tw] OR "Perfluorodecanesulfonate"[tw] OR "Perfluorodecanesulfonic acid"[tw] OR "Perfluorodecylsulfonate"[tw] OR ("PFDS"[tw] AND (fluorocarbon\*[tw] OR fluorotelomer\*[tw] OR polyfluoro\*[tw] OR perfluoro-\*[tw] OR perfluoroa\*[tw] OR perfluorob\*[tw] OR perfluoroc\*[tw] OR perfluorod\*[tw] OR perfluoroe\*[tw] OR perfluoroh\*[tw] OR perfluoron\*[tw] OR perfluoroo\*[tw] OR perfluorop\*[tw] OR perfluoros\*[tw] OR perfluorou\*[tw] OR perfluorinated[tw] OR fluorinated[tw] OR PFAS[tw] OR PFOS[tw] OR PFOA[tw])) OR ("1,1,2,2,3,3,4,4,5,5,6,6,7,7,8,8,9,9,10,10-heneicosafuoro-1-Decanesulfonic"[tw] OR "1,1,2,2,3,3,4,4,5,5,6,6,7,7,8,8,9,9,10,10-Heneicosafuorodecane-1-sulfonic"[tw] OR "Heneicosafuoro-1-decanesulfonic"[tw] OR "Heneicosafuorodecanesulphonic"[tw] OR "Perfluorodecane sulfonic"[tw] OR "Perfluorodecanesulfonic"[tw]) AND (acid[tiab] OR acids[tiab]))

**ToxLine/ToxNet** Did not search

**PFNS**

HERO page <sup>a,b</sup> (accessed 15 June 2021):

[https://heronet.epa.gov/heronet/index.cfm/project/page/project\\_id/3006](https://heronet.epa.gov/heronet/index.cfm/project/page/project_id/3006)

**Web of Science** (TS="68259-12-1" or TS="Perfluorononanesulfonic acid" or TS="1-Nonanesulfonic acid, 1,1,2,2,3,3,4,4,5,5,6,6,7,7,8,8,9,9,9-nonadecafluoro-" or TS="1,1,2,2,3,3,4,4,5,5,6,6,7,7,8,8,9,9,9-Nonadecafluoro-1-nonanesulfonic acid" or TS="PFNS" or TS="Nonadecafluorononane-1-sulfonic acid" or TS="1-Nonanesulfonic acid, 1,1,2,2,3,3,4,4,5,5,6,6,7,7,8,8,9,9,9-nonadecafluoro-" or TS="Nonadecafluoro-1-nonanesulfonic acid") AND (TS="ADME" OR TS="neurolog\*" OR TS="development\*" OR TS="respirator\*" OR TS="ocular" OR TS="sensory" OR TS="hematolog\*" OR TS="nutrition\*" OR TS="metabol\*" OR TS="musculoskelet\*" OR TS="cancer" OR TS="mortality" OR TS="gastrointest\*" OR TS="skin" OR TS="connective tissue" OR TS="derm\*" OR TS="endocrine" OR TS="cardiovascular" OR TS="reproduct\*" OR TS="renal" OR TS="hepatic" OR TS="PBPk" OR TS="human health" OR TS="health" OR TS="human" OR TS="epidemiology" OR TS="child\*" OR TS="teenager\*" OR TS="adolescen\*" OR TS="pregnan\*" OR TS="adult\*" OR TS="general population" OR TS="population" OR TS="acute" OR TS="intermittent" OR TS="subchronic" OR TS="chronic" OR TS="heart" OR TS="liver" OR TS="nerv\*" OR TS="dermal" OR TS="lung" OR TS="blood" OR TS="serum" OR TS="birth" OR TS="pulmonary" OR TS="disease" OR TS="death")

**PubMed** 68259-12-1[rn] or "Perfluorononanesulfonic acid"[tw] or "1-Nonanesulfonic acid, 1,1,2,2,3,3,4,4,5,5,6,6,7,7,8,8,9,9,9-nonadecafluoro-"[tw] or "1,1,2,2,3,3,4,4,5,5,6,6,7,7,8,8,9,9,9-Nonadecafluoro-1-nonanesulfonic acid"[tw] or "PFNS"[tw] or "Nonadecafluorononane-1-sulfonic acid"[tw] or "1-Nonanesulfonic acid, 1,1,2,2,3,3,4,4,5,5,6,6,7,7,8,8,9,9,9-nonadecafluoro-"[tw] or "Nonadecafluoro-1-nonanesulfonic acid"[tw] or

**ToxLine/ToxNet** Did not search

**Database Search String****PFHpS**HERO page <sup>a</sup> (accessed 15 June 2021):[https://hero.epa.gov/hero/index.cfm/project/page/project\\_id/2826](https://hero.epa.gov/hero/index.cfm/project/page/project_id/2826)**Web of Science**

(TS="1-Heptanesulfonic acid, 1,1,2,2,3,3,4,4,5,5,6,6,7,7,7-pentadecafluoro-" OR TS="1-Heptanesulfonic acid, pentadecafluoro-" OR TS="1- Perfluoroheptanesulfonic acid" OR TS="1,1,2,2,3,3,4,4,5,5,6,6,7,7,7- Pentadecafluoroheptan-1-sulfonsaure" OR TS="1,1,2,2,3,3,4,4,5,5,6,6,7,7,7- Pentadecafluoro-1-heptanesulfonic acid" OR TS="1,1,2,2,3,3,4,4,5,5,6,6,7,7,7-Pentadecafluoroheptane-1-sulfonic acid" OR TS="1,1,2,2,3,3,4,4,5,5,6,6,7,7,7-pentadecafluoroheptane-1-sulphonique" OR TS="acide 1,1,2,2,3,3,4,4,5,5,6,6,7,7,7-pentadecafluoroheptane-1-sulfonique" OR TS="acido 1,1,2,2,3,3,4,4,5,5,6,6,7,7,7- pentadecafluoroheptano-1-sulfonico" OR TS="EINECS 206-800-8" OR TS="Pentadecafluoro-1-heptanesulfonic acid" OR TS="Pentadecafluoroheptane-1-sulfonic acid" OR TS="Perfluoroheptanesulfonic acid" OR TS="PFHpS" OR TS="375-92-8") AND (TS="ADME" OR TS="neurolog\*" OR TS="development\*" OR TS="respirator\*" OR TS="ocular" OR TS="sensory" OR TS="hematolog\*" OR TS="nutrition\*" OR TS="metabol\*" OR TS="musculoskelet\*" OR TS="cancer" OR TS="mortality" OR TS="gastrointest\*" OR TS="skin" OR TS="connective tissue" OR TS="derm\*" OR TS="endocrine" OR TS="cardiovascular" OR TS="reproduct\*" OR TS="renal" OR TS="hepatic" OR TS="PBPk" OR TS="human health" OR TS="health" OR TS="human" OR TS="epidemiology" OR TS="child\*" OR TS="teenager\*" OR TS="adolescen\*" OR TS="pregnan\*" OR TS="adult\*" OR TS="general population" OR TS="population" OR TS="acute" OR TS="intermittent" OR TS="subchronic" OR TS="chronic" OR TS="heart" OR TS="liver" OR TS="nerv\*" OR TS="dermal" OR TS="lung" OR TS="blood" OR TS="serum" OR TS="birth" OR TS="pulmonary" OR TS="disease" OR TS="death")

**PubMed**

("1-Heptanesulfonic acid, 1,1,2,2,3,3,4,4,5,5,6,6,7,7,7-pentadecafluoro-" [tw] OR "1-Heptanesulfonic acid, pentadecafluoro-" [tw] OR "1- Perfluoroheptanesulfonic acid" [tw] OR "1,1,2,2,3,3,4,4,5,5,6,6,7,7,7- Pentadecafluoroheptan-1-sulfonsaure" [tw] OR "1,1,2,2,3,3,4,4,5,5,6,6,7,7,7- Pentadecafluoro-1-heptanesulfonic acid" [tw] OR "1,1,2,2,3,3,4,4,5,5,6,6,7,7,7- Pentadecafluoroheptane-1-sulfonic acid" [tw] OR "1,1,2,2,3,3,4,4,5,5,6,6,7,7,7-pentadecafluoroheptane-1-sulphonique" [tw] OR "acide 1,1,2,2,3,3,4,4,5,5,6,6,7,7,7-pentadecafluoroheptane-1-sulfonique" [tw] OR "acido 1,1,2,2,3,3,4,4,5,5,6,6,7,7,7- pentadecafluoroheptano-1-sulfonico" [tw] OR "EINECS 206-800-8" [tw] OR "Pentadecafluoro-1-heptanesulfonic acid" [tw] OR "Pentadecafluoroheptane-1-sulfonic acid" [tw] OR "Perfluoroheptanesulfonic acid" [tw] OR "PFHpS" [tw] OR 375-92-8 [rn])

**ToxLine/ToxNet**

@SYNO+@AND+@OR+("1- Heptanesulfonic+acid,+1,1,2,2,3,3,4,4,5,5,6,6,7,7,7-pentadecafluoro-"+"1-Heptanesulfonic+acid,+pentadecafluoro-"+"1- Perfluoroheptanesulfonic+acid"+"1,1,2,2,3,3,4,4,5,5,6,6,7,7,7-Pentadecafluoroheptan-1-sulfonsaure"+"1,1,2,2,3,3,4,4,5,5,6,6,7,7,7- Date: 8/30/19 Results: 0 Pentadecafluoro-1-heptanesulfonic+acid"+"1,1,2,2,3,3,4,4,5,5,6,6,7,7,7- Pentadecafluoroheptane-1-sulfonic+acid"+"1,1,2,2,3,3,4,4,5,5,6,6,7,7,7- pentadecafluoroheptane-1-sulphonique"+"acide+1,1,2,2,3,3,4,4,5,5,6,6,7,7,7- pentadecafluoroheptane-1-sulfonique"+"acido+1,1,2,2,3,3,4,4,5,5,6,6,7,7,7- pentadecafluoroheptano-1-sulfonico"+"EINECS+206-800-8"+"Pentadecafluoro-1-heptanesulfonic+acid"+"Pentadecafluoroheptane-1-sulfonic+acid"+"Perfluoroheptanesulfonic+acid"+PFHpS+@TERM+@rn+375-92-8)+@NOT+@org+pubmed+pubdart+nih

**PFPeS**HERO page <sup>a,b</sup> (accessed 15 June 2021):[https://heronet.epa.gov/heronet/index.cfm/project/page/project\\_id/3006](https://heronet.epa.gov/heronet/index.cfm/project/page/project_id/3006)**Web of Science**

(TS="2706-91-4" or TS="Perfluoropentanesulfonic acid" or TS="Perfluoropentane-1-sulphonic acid" or TS="1-Pentanesulfonic acid, undecafluoro-" or TS="Undecafluoropentanesulfonic acid" or TS="Undecafluoro-1-pentanesulfonic acid" or TS="perfluoropentane-1-sulphonic acid" or TS="acide perfluoropentane-1-sulfonique" or TS="Perfluoropentane-1-sulfonsaure" or TS="acido perfluoropentano-1-sulfonico" or TS="1,1,2,2,3,3,4,4,5,5,5-undecafluoropentane-1-sulfonic acid" or TS="EINECS 220-301-2" or TS="EC 220-301-2" or TS="PFPeS" or TS="Undecafluoropentane-1-sulfonic acid" or TS="1-Pentanesulfonic acid, 1,1,2,2,3,3,4,4,5,5,5-undecafluoro-" or TS="1-Pentanesulfonic acid, 1,1,2,2,3,3,4,4,5,5,5-undecafluoro-" or TS="1,1,2,2,3,3,4,4,5,5,5-Undecafluoro-1-pentanesulfonic acid") AND (TS="ADME" OR TS="neurolog\*" OR TS="development\*" OR TS="respirator\*" OR TS="ocular" OR TS="sensory" OR TS="hematolog\*" OR TS="nutrition\*" OR TS="metabol\*" OR TS="musculoskelet\*" OR TS="cancer" OR TS="mortality" OR TS="gastrointest\*" OR TS="skin" OR TS="connective tissue" OR TS="derm\*" OR TS="endocrine" OR TS="cardiovascular" OR TS="reproduct\*" OR TS="renal" OR TS="hepatic" OR TS="PBPk" OR TS="human health" OR TS="health" OR TS="human" OR TS="epidemiology" OR TS="child\*" OR TS="teenager\*" OR TS="adolescen\*" OR TS="pregnan\*" OR TS="adult\*" OR TS="general population" OR TS="population" OR TS="acute" OR TS="intermittent" OR TS="subchronic" OR TS="chronic" OR TS="heart" OR TS="liver" OR TS="nerv\*" OR TS="dermal" OR TS="lung" OR TS="blood" OR TS="serum" OR TS="birth" OR TS="pulmonary" OR TS="disease" OR TS="death")

**PubMed***Did not search***ToxLine/ToxNet***Did not search*

**Database Search String****10:2 FTOH**HERO page <sup>a,b</sup> (accessed 15 June 2021):[https://heronet.epa.gov/heronet/index.cfm/project/page/project\\_id/3006](https://heronet.epa.gov/heronet/index.cfm/project/page/project_id/3006)**Web of Science**

TS="865-86-1" OR "10:2 Fluorotelomer alcohol" OR "1-Dodecanol, 3,3,4,4,5,5,6,6,7,7,8,8,9,9,10,10,11,11,12,12,12-heneicosafuoro-" OR "3,3,4,4,5,5,6,6,7,7,8,8,9,9,10,10,11,11,12,12,12-Heneicosafuoro-1-dodecanol" OR "1,1,2,2-Tetrahydroheneicosafuorododecanol" OR "1,1,2,2-Tetrahydroperfluorododecanol" OR "Fluorotelomer alcohol 10:2" OR "1H,1H,2H,2H-Perfluorododecan-1-ol" OR "1H,1H,2H,2H-Perfluorododecanol" OR "2-(Perfluorodecyl)ethanol" OR "2-(Perfluorodecyl)ethyl alcohol" OR "3,3,4,4,5,5,6,6,7,7,8,8,9,9,10,10,11,11,12, 12,12-Heneicosafuorododecan-1-ol" OR "1,1,2,2-Tetrahydroperfluoro-1-dodecanol" OR "A 2020" OR "A 2020 (fluoro compound)" OR "PFA 10" OR "1-Dodecanol, 3,3,4,4,5,5,6,6,7,7,8,8,9,9,10,10,11,11,12,12,12-heneicosafuoro-" OR "3,3,4,4,5,5,6,6,7,7,8,8,9,9,10,10,11,11,12,12,12-Heneicosafuorododecanol" OR "3,3,4,4,5,5,6,6,7,7,8,8,9,9,10,10,11,11,12,12,12-heneicosafuorododecanol" OR "3,3,4,4,5,5,6,6,7,7,8,8,9,9,10,10,11,11,12,12,12-Heneicosafuorododecanol" OR "2-(Perfluorodecyl)ethanol" OR "FTOH 10:2" OR "1H,1H,2H,2H-perfluoro-1-dodecanol" OR "10:2 FTOH" OR "3,3,4,4,5,5,6,6,7,7,8,8,9,9,10,10,11,11,12,12,12-Heneicosafuorododecan-1-ol" OR "1-Dodecanol, 3,3,4,4,5,5,6,6,7,7,8,8,9,9,10,10,11,11,12,12,12-heneicosafuoro-" OR "1,1,2,2-Tetrahydroperfluoro dodecanol"

**PubMed**

865-86-1[rn] OR "10:2 Fluorotelomer alcohol"[tw] OR "1-Dodecanol, 3,3,4,4,5,5,6,6,7,7,8,8,9,9,10,10,11,11,12,12,12-heneicosafuoro-"[tw] OR "3,3,4,4,5,5,6,6,7,7,8,8,9,9,10,10,11,11,12,12,12-Heneicosafuoro-1-dodecanol"[tw] OR "1,1,2,2-Tetrahydroheneicosafuorododecanol"[tw] OR "1,1,2,2-Tetrahydroperfluorododecanol"[tw] OR "Fluorotelomer alcohol 10:2"[tw] OR "1H,1H,2H,2H-Perfluorododecan-1-ol"[tw] OR "1H,1H,2H,2H-Perfluorododecanol"[tw] OR "2-(Perfluorodecyl)ethanol"[tw] OR "2-(Perfluorodecyl)ethyl alcohol"[tw] OR "3,3,4,4,5,5,6,6,7,7,8,8,9,9,10,10,11,11,12, 12,12-Heneicosafuorododecan-1-ol"[tw] OR "1,1,2,2-Tetrahydroperfluoro-1-dodecanol"[tw] OR "A 2020" OR "A 2020 (fluoro compound)"[tw] OR "PFA 10"[tw] OR "1-Dodecanol, 3,3,4,4,5,5,6,6,7,7,8,8,9,9,10,10,11,11,12,12,12-heneicosafuoro-"[tw] OR "3,3,4,4,5,5,6,6,7,7,8,8,9,9,10,10,11,11,12,12,12-Heneicosafuorododecanol"[tw] OR "3,3,4,4,5,5,6,6,7,7,8,8,9,9,10,10,11,11,12,12,12-heneicosafuorododecanol"[tw] OR "3,3,4,4,5,5,6,6,7,7,8,8,9,9,10,10,11,11,12,12,12-Heneicosafuorododecanol"[tw] OR "2-(Perfluorodecyl)ethanol"[tw] OR "FTOH 10:2"[tw] OR "1H,1H,2H,2H-perfluoro-1-dodecanol"[tw] OR "10:2 FTOH"[tw] OR "3,3,4,4,5,5,6,6,7,7,8,8,9,9,10,10,11,11,12,12,12-Heneicosafuorododecan-1-ol"[tw] OR "1-Dodecanol, 3,3,4,4,5,5,6,6,7,7,8,8,9,9,10,10,11,11,12,12,12-heneicosafuoro-"[tw] OR "1,1,2,2-Tetrahydroperfluoro dodecanol"[tw]

**ToxLine/***Did not search***ToxNet****8:2 FTOH**HERO page <sup>a</sup> (accessed 15 June 2021):[https://hero.epa.gov/hero/index.cfm/project/page/project\\_id/2826](https://hero.epa.gov/hero/index.cfm/project/page/project_id/2826)**Web of Science**

((TS="(Perfluorooctyl)ethanol" or TS="1-Decanol, 3,3,4,4,5,5,6,6,7,7,8,8, 9,9,10,10,10-heptadecafluoro-" or TS="1- Decanol, 3,3,4,4,5,5,6,6,7,7,8,8,9,9,10,10,10-heptadecafluoro-" or TS="1,1,2,2-Tetrahydroheptadecafluorododecanol" or TS="1,1,2,2-Tetrahydroperfluoro-1-decanol" or TS="1,1,2,2- Tetrahydroperfluorodecan-1-ol" or TS="1,1,2,2- Tetrahydroperfluorodecanol" or TS="1,1,2,2- Tetrahydroperfluorodecyl alcohol" or TS="1H,1H,2H,2HHeptadecafluoro-1-decanol" or TS="1H,1H,2H,2H-Perfluorodecan-1-ol" or TS="1H,1H,2H,2H-Perfluorodecanol" or TS="1H,1H,2H,2H-Tetrahydroperfluoro-1-decanol" or TS="2-(Heptadecafluorooctyl)ethanol" or TS="2-(Perfluorooctyl)ethanol" or TS="2-(Perfluorooctyl)ethyl alcohol" or TS="2-Perfluorooctyl ethanl (8:2)" or TS="2-perfluorooctylethanol" or TS="3,3,4,4,5,5,6,6,7,7,8,8,9,9,10,10,10-Heptadecafluoro-1-decanol" or TS="3,3,4,4,5,5,6,6,7,7,8,8,9,9,10,10,10- Heptadecafluorodecan-1-ol" or TS="678-39-7" or TS="8-2 Telomer B alcohol" or TS="8:2 Fluorotelomer alcohol" or TS="8:2 FTOH" or TS="A 1820" or TS="beta- (Heptadecafluorooctyl)ethanol" or TS="C 1820" or TS="Daikin A 1820" or TS="EINECS 211-648-0" or TS="Fluorotelomer alcohol 8:2" or TS="Fluowet EA 800" or TS="FtOH 8:2" or TS="PFA 8" or TS="UNII-UM7" or TS="678-39-7") AND (TS="ADME" OR TS="neurolog\*" OR TS="development\*" OR TS="respirator\*" OR 211 8/20/2019 TS="ocular" OR TS="sensory" OR TS="hematolog\*" OR TS="nutrition\*" OR TS="metabol\*" OR TS="musculoskelet\*" OR TS="cancer" OR TS="mortality" OR TS="gastrointenst\*" OR TS="skin" OR TS="connective tissue" OR TS="derm\*" OR TS="endocrine" OR TS="cardiovascular" OR TS="reproduct\*" OR TS="renal" OR TS="hepatic" OR TS="PBPK" OR TS="human health" OR TS="health" OR TS="human" OR TS="epidemiology" OR TS="child\*" OR TS="teenager\*" OR TS="adolescenc\*" OR TS="pregnan\*" OR TS="adult\*" OR TS="general population" OR TS="population" OR TS="acute" OR TS="intermittent" OR TS="subchronic" OR TS="chronic" OR TS="heart" OR TS="liver" OR TS="nerv\*" OR TS="dermal" OR TS="lung" OR TS="blood" OR TS="serum" OR TS="birth" OR TS="pulmonary" OR TS="disease" OR TS="death")) AND PY=1900-2019

| Database                                                                                                                                                                                           | Search String                                                                                                                                                                                                                                                                                                                                                                                                                                                                                                                                                                                                                                                                                                                                                                                                                                                                                                                                                                                                                                                                                                                                                                                                                                                                                                                                                                                                                                                                                                                                                                                                                                                                                                                                                                                                                                                                                                                                                                                                                                                            |
|----------------------------------------------------------------------------------------------------------------------------------------------------------------------------------------------------|--------------------------------------------------------------------------------------------------------------------------------------------------------------------------------------------------------------------------------------------------------------------------------------------------------------------------------------------------------------------------------------------------------------------------------------------------------------------------------------------------------------------------------------------------------------------------------------------------------------------------------------------------------------------------------------------------------------------------------------------------------------------------------------------------------------------------------------------------------------------------------------------------------------------------------------------------------------------------------------------------------------------------------------------------------------------------------------------------------------------------------------------------------------------------------------------------------------------------------------------------------------------------------------------------------------------------------------------------------------------------------------------------------------------------------------------------------------------------------------------------------------------------------------------------------------------------------------------------------------------------------------------------------------------------------------------------------------------------------------------------------------------------------------------------------------------------------------------------------------------------------------------------------------------------------------------------------------------------------------------------------------------------------------------------------------------------|
| PubMed                                                                                                                                                                                             | "678-39-7"[rn] or "(Perfluorooctyl)ethanol"[tw] or "1-Decanol, 3,3,4,4,5,5,6,6,7,7,8,8, 9,9,10,10,10-heptadecafluoro-"[tw] or "1- Decanol, 3,3,4,4,5,5,6,6,7,7,8,8,9,9,10,10,10-heptadecafluoro- "[tw] or "1,1,2,2-Tetrahydroheptadecafluorodecanol"[tw] or "1,1,2,2-Tetrahydroperfluoro-1-decanol"[tw] or "1,1,2,2-Tetrahydroperfluorodecan-1-ol"[tw] or "1,1,2,2- Tetrahydroperfluorodecanol"[tw] or "1,1,2,2- Tetrahydroperfluorodecanol"[tw] or "1H,1H,2H,2HHeptadecafluoro-1-decanol"[tw] or "1H,1H,2H,2HPerfluorodecan-1-ol"[tw] or "1H,1H,2H,2H-Perfluorodecanol"[tw] or "1H,1H,2H,2H-Tetrahydroperfluoro-1-decanol"[tw] or "2- (Heptadecafluorooctyl)ethanol"[tw] or "2- (Perfluorooctyl)ethanol"[tw] or "2-(Perfluorooctyl)ethyl alcohol"[tw] or "2-Perfluorooctyl ethanol (8:2)"[tw] or "2-perfluorooctylethanol"[tw] or "3,3,4,4,5,5,6,6,7,7,8,8,9,9,10,10,10-Heptadecafluoro-1- decanol"[tw] or "3,3,4,4,5,5,6,6,7,7,8,8,9,9,10,10,10- Heptadecafluorodecan-1-ol"[tw] or "8-2 Telomer B alcohol"[tw] or "8:2 Fluorotelomer alcohol"[tw] or "8:2 FTOH"[tw] or "A 1820"[tw] or "beta-(Heptadecafluorooctyl)ethanol"[tw] or "C 1820"[tw] or "Daikin A 1820"[tw] or "EINECS 211-648-0"[tw] or "Fluorotelomer alcohol 8:2"[tw] or "Fluowet EA 800"[tw] or "FtOH 8:2"[tw] or "PFA 8"[tw] or "UNII-UM7"[tw]                                                                                                                                                                                                                                                                                                                                                                                                                                                                                                                                                                                                                                                                                                                                                         |
| ToxLine/<br>ToxNet                                                                                                                                                                                 | @AND+@OR+("(Perfluorooctyl)ethanol" or "1-Decanol, 3,3,4,4,5,5,6,6,7,7,8,8, 9,9,10,10,10-heptadecafluoro-" or "1- Decanol, 3,3,4,4,5,5,6,6,7,7,8,8,9,9,10,10,10-heptadecafluoro- " or "1,1,2,2-Tetrahydroheptadecafluorodecanol" or "1,1,2,2-Tetrahydroperfluoro-1-decanol" "1,1,2,2- Tetrahydroperfluorodecan-1-ol" or "1,1,2,2- Tetrahydroperfluorodecanol" or "1,1,2,2- Tetrahydroperfluorodecanol" or "1H,1H,2H,2HHeptadecafluoro-1-decanol" or "1H,1H,2H,2HPerfluorodecan-1- ol" or "1H,1H,2H,2H-Perfluorodecanol" or "1H,1H,2H,2HTetrahydroperfluoro-1-decanol" or "2- (Heptadecafluorooctyl)ethanol" or "2-(Perfluorooctyl)ethanol" or "2-(Perfluorooctyl)ethyl alcohol" or "2-Perfluorooctyl ethanol (8:2)" or "2-perfluorooctylethanol" or "3,3,4,4,5,5,6,6,7,7,8,8,9,9,10,10,10-Heptadecafluoro-1-decanol" or "3,3,4,4,5,5,6,6,7,7,8,8,9,9,10,10,10-Heptadecafluorodecan-1- ol" or "678-39-7" or "8-2 Telomer B alcohol" or "8:2 Fluorotelomer alcohol" or "8:2 FTOH" or "A 1820" or "beta- (Heptadecafluorooctyl)ethanol" or "C 1820" or "Daikin A 1820" or "EINECS 211-648-0" or "Fluorotelomer alcohol 8:2" or "Fluowet EA 800" or "FtOH 8:2" or "PFA 8" or "UNII-UM7" or "678-39- 7")+@RANGE+yr+1900+2019+@NOT+@org+pubmed+pubdart+nih                                                                                                                                                                                                                                                                                                                                                                                                                                                                                                                                                                                                                                                                                                                                                                                                                     |
| <b>6:2 FTOH</b>                                                                                                                                                                                    |                                                                                                                                                                                                                                                                                                                                                                                                                                                                                                                                                                                                                                                                                                                                                                                                                                                                                                                                                                                                                                                                                                                                                                                                                                                                                                                                                                                                                                                                                                                                                                                                                                                                                                                                                                                                                                                                                                                                                                                                                                                                          |
| HERO page <sup>a</sup> (accessed 15 June 2021):<br><a href="https://hero.epa.gov/hero/index.cfm/project/page/project_id/2826">https://hero.epa.gov/hero/index.cfm/project/page/project_id/2826</a> |                                                                                                                                                                                                                                                                                                                                                                                                                                                                                                                                                                                                                                                                                                                                                                                                                                                                                                                                                                                                                                                                                                                                                                                                                                                                                                                                                                                                                                                                                                                                                                                                                                                                                                                                                                                                                                                                                                                                                                                                                                                                          |
| Web of<br>Science                                                                                                                                                                                  | (TS="1-Octanol, 3,3,4,4,5,5,6,6,7,7,8,8,8-tridecafluoro-" OR TS="1,1,2,2- Tetrahydroperfluoro-1-octanol" OR TS="1,1,2,2- Tetrahydroperfluorooctan-1-ol" OR TS="1,1,2,2-Tetrahydroperfluorooctanol" OR TS="1,1,2,2-Tetrahydrotridecafluorooctanol" OR TS="1H,1H,2H,2H-Perfluoro-1-octanol" OR TS="1H,1H,2H,2H-Perfluorooctan-1-ol" OR TS="1H,1H,2H,2H-Perfluorooctanol" OR TS="1H,1H,2H,2H-Tetrahydroperfluoro-1-octanol" OR TS="1H,1H,2H,2H-Tridecafluoro-1-octanol" OR TS="1H,1H,2H,2H-Tridecafluoro-noctanol" OR TS="1H,1H,2H,2H-Tridecafluorooctanol" OR TS="2-(Perfluorohexyl)ethanol" OR TS="2-(Perfluorohexyl)ethyl alcohol" OR TS="2-(Tridecafluorohexyl)ethanol" OR TS="3,3,4,4,5,5,6,6,7,7,8,8,8-Tridecafluorooctan-1-ol" OR TS="3,3,4,4,5,5,6,6,7,7,8,8,8- Tridecafluorooctan-1-ol" OR TS="3,3,4,4,5,5,6,6,7,7,8,8,8-tridecafluorooctane-1-ol" OR TS="3,3,4,4,5,5,6,6,7,7,8,8,8-Tridecafluorooctanol" OR TS="6:2 Fluorotelomer alcohol" OR TS="6:2 FTOH" OR TS="Capstone 62AL" OR TS="Cheminox FA 6" OR TS="EINECS 211-477-1" OR TS="Fluorotelomer alcohol 6:2" OR TS="Fluowet EA 600" OR TS="Foralkyl EOH 6" OR TS="FtOH 6:2" OR TS="Perfluorohexylethanol" OR TS="TEOH 6" OR TS="UNII G2R5Y05N3V") AND (TS="ADME" OR TS="neurolog*" OR TS="development*" OR TS="respirator*" OR TS="ocular" OR TS="sensory" OR TS="hematolog*" OR TS="nutrition*" OR TS="metabol*" OR TS="musculoskelet*" OR TS="cancer" OR TS="mortality" OR TS="gastrointest*" OR TS="skin" OR TS="connective tissue" OR TS="derm*" OR TS="endocrine" OR TS="cardiovascular" OR TS="reproduct*" OR TS="renal" OR TS="hepatic" OR TS="PBPK" OR TS="human health" OR TS="health" OR TS="human" OR TS="epidemiology" OR TS="child*" OR TS="teenager*" OR TS="adolescen*" OR TS="pregnan*" OR TS="adult*" OR TS="general population" OR TS="population" OR TS="acute" OR TS="intermittent" OR TS="subchronic" OR TS="chronic" OR TS="heart" OR TS="liver" OR TS="nerv*" OR TS="dermal" OR TS="lung" OR TS="blood" OR TS="serum" OR TS="birth" OR TS="pulmonary" OR TS="disease" OR TS="death") |
| PubMed                                                                                                                                                                                             | ("1-Octanol, 3,3,4,4,5,5,6,6,7,7,8,8,8-tridecafluoro-"[tw] OR "1,1,2,2-Tetrahydroperfluoro-1-octanol"[tw] OR "1,1,2,2-Tetrahydroperfluorooctan-1-ol"[tw] OR "1,1,2,2- Tetrahydroperfluorooctanol"[tw] OR "1,1,2,2-Tetrahydrotridecafluorooctanol"[tw] OR "119937-79-0"[rn] OR "1H,1H,2H,2H-Perfluoro-1-octanol"[tw] OR "1H,1H,2H,2HPerfluorooctan-1-ol"[tw] OR "1H,1H,2H,2H-Perfluorooctanol"[tw] OR "1H,1H,2H,2HTetrahydroperfluoro-1-octanol"[tw] OR "1H,1H,2H,2H-Tridecafluoro-1-octanol"[tw] OR "1H,1H,2H,2H-Tridecafluoro-n-octanol"[tw] OR "1H,1H,2H,2H-Tridecafluorooctanol"[tw] OR "2-(Perfluorohexyl)ethanol"[tw] OR "2-(Perfluorohexyl)ethyl alcohol"[tw] OR "2- (Tridecafluorohexyl)ethanol"[tw] OR "3,3,4,4,5,5,6,6,7,7,8,8,8-Tridecafluorooctan-1-ol"[tw] OR "3,3,4,4,5,5,6,6,7,7,8,8,8-Tridecafluorooctane-1-ol"[tw] OR "3,3,4,4,5,5,6,6,7,7,8,8,8- tridecafluorooctane-1-ol"[tw] OR "3,3,4,4,5,5,6,6,7,7,8,8,8-Tridecafluorooctanol"[tw] OR "6:2 Fluorotelomer alcohol"[tw] OR "6:2 FTOH"[tw] OR "647-42-7"[rn] OR "Capstone 62AL"[tw] OR "Cheminox FA 6"[tw] OR "EINECS 211-477-1"[tw] OR "Fluorotelomer alcohol 6:2"[tw] OR "Fluowet EA 600"[tw] OR "Foralkyl EOH 6"[tw] OR "FtOH 6:2"[tw] OR "Perfluorohexylethanol"[tw] OR "TEOH 6"[tw] OR "UNII- G2R5Y05N3V"[tw])                                                                                                                                                                                                                                                                                                                                                                                                                                                                                                                                                                                                                                                                                                                                                                                    |
| ToxLine/<br>ToxNet                                                                                                                                                                                 | @AND+@OR+("1+Heptanol+2+2+3+3+4+4+5+5+6+6+7+7+7+tridecafluoro"+"1+1+Dihydroperfluoroheptanol"+"1H+1H+Perf luoro+1+heptanol"+"1H+1H+Perfluoroheptanol"+"1H+1H+Tridecafluoro"+"2+2+3+3+4+4+5+5+6+6+7+7+7+Tridecafluor"+" 6+1+Fluorotelomer+alcohol"+"6+1+FTOH"+"EC+206+796+8"+"EINECS+206+796+8"+"Fluorotelomer+alcohol+6+1"+"FTOH+ 6+1"+Perfluorohexylmethanol+Dihydroperfluoroheptanol+@TERM+@rn+375-82-6)+@NOT+@org+pubmed+pubdart+ nih+reporter"                                                                                                                                                                                                                                                                                                                                                                                                                                                                                                                                                                                                                                                                                                                                                                                                                                                                                                                                                                                                                                                                                                                                                                                                                                                                                                                                                                                                                                                                                                                                                                                                                       |

**Database Search String****4:2 FTOH**HERO page <sup>a</sup> (accessed 15 June 2021):[https://hero.epa.gov/hero/index.cfm/project/page/project\\_id/2826](https://hero.epa.gov/hero/index.cfm/project/page/project_id/2826)**Web of Science**

(TS="1-Hexanol, 3,3,4,4,5,5,6,6,6-nonafluoro-" OR TS="1,1,2,2- Tetrahydroperfluoro-1-hexanol" OR TS="1,1,2,2-Tetrahydroperfluorohexan-1-ol" OR TS="1,1,2,2-Tetrahydroperfluorohexyl alcohol" OR TS="1H,1H,2H,2HNonafluoro-1-hexanol" OR TS="1H,1H,2H,2H-Nonafluoro-n-hexanol" OR TS="1H,1H,2H,2H-Nonafluorohexanol" OR TS="1H,1H,2H,2H-Perfluorohexan-1-ol" OR TS="1H,1H,2H,2H-Perfluorohexanol" OR TS="2-(Perfluorobutyl)ethanol" OR TS="2-(Perfluorobutyl)ethyl alcohol" OR TS="3,3,4,4,5,5,6,6,6-Nonafluorohexanol" OR TS="3,3,4,4,5,5,6,6,6-Nonafluoro-1-hexanol" OR TS="3,3,4,4,5,5,6,6,6- Nonafluorohexan-1-ol" OR TS="3,3,4,4,5,5,6,6,6-Nonafluorohexanol" OR TS="4:2 Fluorotelomer alcohol" OR TS="4:2 FTOH" OR TS="EINECS 218-050-9" OR TS="Fluorotelomer alcohol 4:2" OR TS="FTOH 4:2" OR TS="Perfluorobutylethanol" OR TS="TEOH 4") AND (TS="ADME" OR TS="neurolog\*" OR TS="development\*" OR TS="respirator\*" OR TS="ocular" OR TS="sensory" OR TS="hematolog\*" OR TS="nutrition\*" OR TS="metabol\*" OR TS="musculoskelet\*" OR TS="cancer" OR TS="mortality" OR TS="gastrointest\*" OR TS="skin" OR TS="connective tissue" OR TS="derm\*" OR TS="endocrine" OR TS="cardiovascular" OR TS="reproduct\*" OR TS="renal" OR TS="hepatic" OR TS="PBPK" OR TS="human health" OR TS="health" OR TS="human" OR TS="epidemiology" OR TS="child\*" OR TS="teenager\*" OR TS="adolescen\*" OR TS="pregnan\*" OR TS="adult\*" OR TS="general population" OR TS="population" OR TS="acute" OR TS="intermittent" OR TS="subchronic" OR TS="chronic" OR TS="heart" OR TS="liver" OR TS="nerv\*" OR TS="dermal" OR TS="lung" OR TS="blood" OR TS="serum" OR TS="birth" OR TS="pulmonary" OR TS="disease" OR TS="death")

**PubMed**

("1-Hexanol, 3,3,4,4,5,5,6,6,6-nonafluoro-"[tw] OR "1,1,2,2-Tetrahydroperfluoro-1- hexanol"[tw] OR "1,1,2,2-Tetrahydroperfluorohexan-1-ol"[tw] OR "1,1,2,2- Tetrahydroperfluorohexyl alcohol"[tw] OR "1H,1H,2H,2H-Nonafluoro-1-hexanol"[tw] OR "1H,1H,2H,2H-Nonafluoro-n-hexanol"[tw] OR "1H,1H,2H,2HNonafluorohexanol"[tw] OR "1H,1H,2H,2H-Perfluorohexan-1-ol"[tw] OR "1H,1H,2H,2H-Perfluorohexanol"[tw] OR "2-(Perfluorobutyl)ethanol"[tw] OR "2-(Perfluorobutyl)ethyl alcohol"[tw] OR "2043-47-2"[rn] OR "3,3,4,4,5,5,6,6,6- Nonafluorohexanol"[tw] OR "3,3,4,4,5,5,6,6,6-Nonafluoro-1-hexanol"[tw] OR "3,3,4,4,5,5,6,6,6-Nonafluorohexan-1-ol"[tw] OR "3,3,4,4,5,5,6,6,6- Nonafluorohexanol"[tw] OR "4:2 Fluorotelomer alcohol"[tw] OR "4:2 FTOH"[tw] OR "EINECS 218-050-9"[tw] OR "Fluorotelomer alcohol 4:2"[tw] OR "FTOH 4:2"[tw] OR "Perfluorobutylethanol"[tw] OR "TEOH 4"[tw])

**ToxLine/  
ToxNet**

@AND+@OR+("1+Hexanol+3+3+4+4+5+5+6+6+6+nonafluoro"+"1+1+2+2+Tetrahydroperfluoro"+"1H+1H+2H+2H+Nonafluoro"+"1H+1H+2H+2H+Perfluorohexan"+"2+Perfluorobutyl+ethanol"+"2+Perfluorobutyl+ethyl+alcohol"+"3+3+4+4+5+5+6+6+6+Nonafluor"+"4+2+Fluorotelomer+alcohol"+"4+2+FTOH"+"EINECS+218+050+9"+"Fluorotelomer+alcohol+4+2"+"FTOH+4+2"+Perfluorobutylethanol+TEOH+4"+@T ERM+@rn+2043-47-2)+@NOT+@org+pubmed+pubdart+ nih+reporter"

<sup>a</sup> This web page encompasses many PFAS. Filter to the PFAS of interest.<sup>b</sup> This web page currently requires an account to access.

Table S2. Filters used in SWIFT-Review

| Broad Category                         | Tag Category                              | Search Terms                                                                                                                                                                                                                                                                                                                                                                                                                                                                                                                                                                                                                                                                                                                                                                                                                                                                                                                                                                                                                                                                                      |
|----------------------------------------|-------------------------------------------|---------------------------------------------------------------------------------------------------------------------------------------------------------------------------------------------------------------------------------------------------------------------------------------------------------------------------------------------------------------------------------------------------------------------------------------------------------------------------------------------------------------------------------------------------------------------------------------------------------------------------------------------------------------------------------------------------------------------------------------------------------------------------------------------------------------------------------------------------------------------------------------------------------------------------------------------------------------------------------------------------------------------------------------------------------------------------------------------------|
| Environmental Media                    | Air                                       | (tiab: ("air" OR "airborne" OR "airflow" OR "atmosphere" OR "atmospheric" OR "particulate*" OR "pm10" OR "pm(10)" OR "pm2.5" OR "pm(2.5)") AND ("bioconcentrat*" OR "concentrat*" OR "level" OR "levels" OR "mg/m3" OR ppm OR "ug/m3"))                                                                                                                                                                                                                                                                                                                                                                                                                                                                                                                                                                                                                                                                                                                                                                                                                                                           |
|                                        | Indoor Air                                | (tiab: ("air" OR "airborne" OR "airflow" OR "particulate*" OR "pm10" OR "pm(10)" OR "pm2.5" OR "pm(2.5)") AND ("indoor" OR "ambient" OR "office" OR "house" OR "home") AND ("bioconcentrat*" OR "concentrat*" OR "level" OR "levels" OR "mg/m3" OR ppm OR "ug/m3"))                                                                                                                                                                                                                                                                                                                                                                                                                                                                                                                                                                                                                                                                                                                                                                                                                               |
|                                        | Water                                     | (tiab: ("bottled water*" OR "community water*" OR "direct water*" OR "doubly labeled water*" OR "doubly labelled water*" OR "estuarine water*" OR "filtered water*" OR "freshwater*" OR "fresh water*" OR "groundwater*" OR "ground water*" OR "indirect water*" OR "irrigation water*" OR "meltwater*" OR "melt water*" OR "natural water*" OR "overland flow*" OR "potable water*" OR "rainwater*" OR "rain water*" OR "reclaimed water*" OR "recreation* water*" OR "riverine water*" OR "riverwater*" OR "river water*" OR "springwater*" OR "spring water*" OR "stormwater*" OR "storm water*" OR "surface runoff*" OR "surface water*" OR "tapwater*" OR "tap water*" OR "total water*" OR "water supply" OR "water supplies" OR "waterwork*" OR "water work*" OR "wellwater*" OR "well water*" OR ("water" OR "waters") AND ("contaminant*" OR "contaminat*" OR "district*" OR "drinkable" OR "drinking" OR "media" OR "medias" OR "medium" OR "pollutant*" OR "pollution" OR "quality" OR "source*")) AND ("bioconcentrat*" OR "concentrat*" OR "level" OR "levels" OR "mg/L" OR "ug/L")) |
|                                        | Food                                      | (tiab: ("baby formula*" OR "beef" OR "bread" OR "breads" OR "breastmilk" OR "cereal" OR "cereals" OR "chicken" OR "colostrum" OR "dairy" OR "diet" OR "dietary" OR "diets" OR "eggs" OR "fat" OR "fats" OR "flour" OR "flours" OR "food*" OR "foremilk" OR "fruit" OR "fruits" OR "grain" OR "grains" OR "hindmilk" OR "infant formula*" OR "lamb" OR "market basket*" OR "meat" OR "meats" OR "milk" OR "nutrient*" OR "nutrition*" OR "nutritive" OR "pasta" OR "pastas" OR "pork" OR "poultry" OR "rice" OR "serving size*" OR "vegetable*" OR biota*) AND ("bioconcentrat*" OR "concentrat*" OR "level" OR "levels" OR "bioaccumul* OR consumption OR consume)) OR (tiab: ("finfish*" OR "fish" OR "fishes" OR "seafood*" OR "shellfish*" OR "sportsfish*") AND ("bioconcentrat*" OR "concentrat*" OR "level" OR "levels" OR "bioaccumul* OR consumption OR consume))                                                                                                                                                                                                                         |
|                                        | Dust                                      | (tiab: ("dust" OR "dusts" OR "dustbin*" OR "dusty" OR "housedust*" OR "house dust" OR "surface dust") AND ("bioconcentrat*" OR "concentrat*" OR "level" OR "levels"))                                                                                                                                                                                                                                                                                                                                                                                                                                                                                                                                                                                                                                                                                                                                                                                                                                                                                                                             |
|                                        | Soil                                      | (tiab: ("silt" OR "silts" OR "sediment*" OR soil* OR sediment* OR TSP) AND ("bioconcentrat*" OR "concentrat*" OR "level" OR "levels"))                                                                                                                                                                                                                                                                                                                                                                                                                                                                                                                                                                                                                                                                                                                                                                                                                                                                                                                                                            |
|                                        | Wastewater                                | (tiab: ("biosolid*" OR "bio solid*" OR "effluent*" OR "potw*" OR "sewage*" OR "sewer*" OR "sludge*" OR "wastewater*" OR "waste water*" OR "wrrf*" OR "wwtp*") AND ("bioconcentrat*" OR "concentrat*" OR "level" OR "levels" OR "mg/L"))                                                                                                                                                                                                                                                                                                                                                                                                                                                                                                                                                                                                                                                                                                                                                                                                                                                           |
|                                        | Landfill                                  | (tiab: ("dumping ground*" OR "garbage dump*" OR "incinerat*" OR "landfill*" OR "leach*") AND ("bioconcentrat*" OR "concentrat*" OR "level" OR "levels"))                                                                                                                                                                                                                                                                                                                                                                                                                                                                                                                                                                                                                                                                                                                                                                                                                                                                                                                                          |
| Products, Articles, Building Materials | Home products, furnishings, and materials | (tiab: ("apartment*" OR "appliance*" OR "architectural" OR "architecture*" OR "building" OR "buildings" OR "carpet" OR "carpeting" OR "carpets" OR "rug" OR "rugs" OR "cement" OR "cements" OR "concrete" OR "condominium*" OR "couch*" OR "sofa*" OR "drywall*" OR "ductwork*" OR "duct work*" OR "fabric*" OR "floor" OR "flooring" OR "floors" OR "home environment*" OR "home product*" OR "house environment*" OR "house product*" OR "insulation*" OR "molding*" OR "paint*" OR "paintchip*" OR "paints" OR "plaster*" OR "residential" OR "roof*" OR "room volume*" OR "townhouse*" OR furniture OR "home furnish*" OR furnishing* OR "home improvement*" OR "building material*" OR "beanbag*" OR "bean bag*" OR "bedding*" OR "blanket" OR "blankets" OR "upholstery") AND ("bioconcentrat*" OR "concentrat*" OR "level" OR "levels"))                                                                                                                                                                                                                                                   |
|                                        | Cookware                                  | (tiab: ("bakeware*" OR "bake ware*" OR "cookware*" OR "cook ware*" OR "pan" OR "pans" OR "pot" OR "pots" OR "utensil*") AND ("bioconcentrat*" OR "concentrat*" OR "level" OR "levels"))                                                                                                                                                                                                                                                                                                                                                                                                                                                                                                                                                                                                                                                                                                                                                                                                                                                                                                           |
|                                        | Water proofing                            | (tiab: ("liquid repel*" OR "liquid-repel*" OR "liquid resist*" OR "outdoor cloth*" OR "waterproof*" OR "water proof*" OR "water repel*" OR "water resist*") AND ("bioconcentrat*" OR "concentrat*" OR "level" OR "levels"))                                                                                                                                                                                                                                                                                                                                                                                                                                                                                                                                                                                                                                                                                                                                                                                                                                                                       |
|                                        | Stain proofing                            | (tiab: ("stain proof*" OR "stain repel*" OR "stain resist*" OR "stain-resist*" OR "stain treatment*") AND ("bioconcentrat*" OR "concentrat*" OR "level" OR "levels"))                                                                                                                                                                                                                                                                                                                                                                                                                                                                                                                                                                                                                                                                                                                                                                                                                                                                                                                             |
|                                        | Nonstick                                  | (tiab: ("nonstick" OR "non stick" OR "nonsticking" OR "non sticking" OR "non-stick*") AND ("bioconcentrat*" OR "concentrat*" OR "level" OR "levels"))                                                                                                                                                                                                                                                                                                                                                                                                                                                                                                                                                                                                                                                                                                                                                                                                                                                                                                                                             |

| Broad Category         | Tag Category           | Search Terms                                                                                                                                                                                                                                                                                                                                                                                                                                                                                                                                                                                                                                                                                                                                                                                                                                                                                                                                                                                                                                                                                                                                                                                                                                                                                                                                                                                                                                                                                                                                                                                                                                                                                                                                                                                                                                                                                                                                                                                                                                                                                                                                                                                                                                                                       |
|------------------------|------------------------|------------------------------------------------------------------------------------------------------------------------------------------------------------------------------------------------------------------------------------------------------------------------------------------------------------------------------------------------------------------------------------------------------------------------------------------------------------------------------------------------------------------------------------------------------------------------------------------------------------------------------------------------------------------------------------------------------------------------------------------------------------------------------------------------------------------------------------------------------------------------------------------------------------------------------------------------------------------------------------------------------------------------------------------------------------------------------------------------------------------------------------------------------------------------------------------------------------------------------------------------------------------------------------------------------------------------------------------------------------------------------------------------------------------------------------------------------------------------------------------------------------------------------------------------------------------------------------------------------------------------------------------------------------------------------------------------------------------------------------------------------------------------------------------------------------------------------------------------------------------------------------------------------------------------------------------------------------------------------------------------------------------------------------------------------------------------------------------------------------------------------------------------------------------------------------------------------------------------------------------------------------------------------------|
| Food Packaging         | Food Packaging         | (tiab: ("food pack*" OR "food wrap*" OR "microwave container*" OR "microwave popcorn bag*" OR "pizza box*" OR "plastic bag*" OR "plastic container*" OR "plastic wrap*" OR "sandwich wrap*" OR "takeout container*" OR "fast food wrap*" OR "fast food container*" OR "food container*") AND ("bioconcentrat*" OR "concentrat*" OR "level" OR "levels"))                                                                                                                                                                                                                                                                                                                                                                                                                                                                                                                                                                                                                                                                                                                                                                                                                                                                                                                                                                                                                                                                                                                                                                                                                                                                                                                                                                                                                                                                                                                                                                                                                                                                                                                                                                                                                                                                                                                           |
| Personal Care Products | Personal Care Products | (tiab: ("blush" OR "blushes" OR "brow pencil*" OR "cheek color*" OR "concealer*" OR "cosmeceutic*" OR "cosmetic*" OR "eyebrow pencil*" OR "eye color*" OR "eyeliner*" OR "eye liner*" OR "eyeshadow*" OR "eye shadow*" OR "face powder*" OR "facial powder*" OR "foundation" OR "foundations" OR "lipcolor*" OR "lip color*" OR "lipstick*" OR "makeup" OR "make up" OR "mascara*" OR "aftershave*" OR "after shave*" OR "antiperspirant*" OR "anti perspirant*" OR "bath capsule*" OR "bath oil*" OR "bath product*" OR "bath salt*" OR "bath tablet*" OR "bathing" OR "body cream*" OR "body spray*" OR "bodywash*" OR "body wash*" OR "breath freshener*" OR "care product*" OR "cleanser*" OR "cuticle cream*" OR "cuticle oil*" OR "dental floss*" OR "deodorant*" OR "face cream*" OR "face serum*" OR "facial cream*" OR "facial serum*" OR "fingernail polish*" OR "foot cream*" OR "foot powder*" OR "foot spray*" OR "gel wash*" OR "hand cream*" OR "hand sanitizer*" OR "lotion*" OR "manicure*" OR "moisturizer*" OR "moisturizing" OR "mouthwash*" OR "mouth wash*" OR "nail adhesive*" OR "nail enamel*" OR "nail polish*" OR "pedicure*" OR "personal care*" OR "personal hygiene" OR "polish remover*" OR "shave cream*" OR "shaving cream*" OR "shower gel*" OR "showering" OR "skincare" OR "skin care" OR "soap" OR "soaps" OR "sunblock*" OR "sun block*" OR "sunless tanner*" OR "sunscreen*" OR "sun screen*" OR "toenail polish*" OR "toiletr*" OR "toothpaste*" OR (("baby" OR "babies" OR "infant" OR "infants" OR "newborn*") AND ("care" OR "bath" OR "bathing" OR "care product*" OR "cream" OR "creams" OR "powder*" OR "shampoo*" OR "wash*" OR "haircare" OR "hair care" OR "lotion*" OR "moisturizer*" OR "moisturizing" OR "powder*" OR "shampoo*" OR "skincare" OR "skin care" OR "soap" OR "soaps" OR "wash*")) OR "hair bleach*" OR "haircare" OR "hair care" OR "haircolor*" OR "hair color*" OR "hair conditioner*" OR "hair dye*" OR "hair product*" OR "hair relaxer*" OR "hair rinse*" OR "hairspray*" OR "hair spray*" OR "hair straightener*" OR "hair tint*" OR "hair tonic*" OR "permanent wave*" OR "cologne*" OR "eau de toilette*" OR "fragrance*" OR "perfume*") AND ("bioconcentrat*" OR "concentrat*" OR "level" OR "levels")) |
| Cleaning Products      | Cleaning Products      | (tiab: ("cleaning product*" OR "air freshener" OR "air fresheners" OR "bleach*" OR "cleaner*" OR "cleaning" OR "deodorizer*" OR "detergent*" OR "dishsoap*" OR "dishwash*" OR "dish wash*" OR "disinfectant*" OR "soap" OR "soaps" OR "spot remover*" OR "stain remover*") AND ("bioconcentrat*" OR "concentrat*" OR "level" OR "levels"))                                                                                                                                                                                                                                                                                                                                                                                                                                                                                                                                                                                                                                                                                                                                                                                                                                                                                                                                                                                                                                                                                                                                                                                                                                                                                                                                                                                                                                                                                                                                                                                                                                                                                                                                                                                                                                                                                                                                         |
| Clothing               | Clothing               | (tiab: ("apparel" OR "bra" OR "bras" OR "cloth" OR "clothes" OR "clothing" OR "colorfast" OR "color fast" OR "diaper" OR "diapers" OR "dresses" OR "footwear" OR "garment*" OR "jeans" OR "polyester" OR "polyesters" OR "ribbon" OR "ribbons" OR "shirt" OR "shirts" OR "shoe" OR "shoes" OR "socks" OR "textile*" OR "trouser*") AND ("bioconcentrat*" OR "concentrat*" OR "level" OR "levels"))                                                                                                                                                                                                                                                                                                                                                                                                                                                                                                                                                                                                                                                                                                                                                                                                                                                                                                                                                                                                                                                                                                                                                                                                                                                                                                                                                                                                                                                                                                                                                                                                                                                                                                                                                                                                                                                                                 |
| Specialty Products     | Specialty Products     | (tiab: ("antifreeze" OR "anti freeze" OR "automobile*" OR "automotive*" OR "car" OR "cars" OR "carseat*" OR "coolant*" OR "motor" OR "motors" OR "tire" OR "tires" OR "vehicle*" OR "acaricide*" OR "adhesive" OR "adhesives" OR "antiseptic*" OR "anti septic*" OR "batteries" OR "battery" OR "blowing agent*" OR "bonding agent*" OR "camping tent*" OR "camp tent*" OR "cigar*" OR "circuit board*" OR "circuitry" OR "colorant*" OR "computer*" OR "degreaser*" OR "degreasing" OR "diesel" OR "doll" OR "dolls" OR "drycleaning" OR "dry cleaning" OR "dye" OR "dyes" OR "electronic" OR "electronics" OR "embalming" OR "fertilizer*" OR "fiberglass*" OR "fiber glass*" OR "fire extinguisher*" OR "firefighting*" OR "fire fighting*" OR "fire-fighting" OR "fireproof*" OR "fire proof*" OR "fire retardant*" OR "flameproof*" OR "flame proof*" OR "flame retardant*" OR "foam" OR "foams" OR "fumigant*" OR "fungicide*" OR "gasoline" OR "glue" OR "glues" OR "herbicide*" OR "ink" OR "inkjet*" OR "insecticide*" OR "kerosene" OR "lacquer*" OR "larvicide*" OR "leather" OR "leathers" OR "lubricant*" OR "miticide*" OR "packaging" OR "packing material*" OR "paper" OR "parasiticide*" OR "pesticide*" OR "petrochemical*" OR "petrol" OR "petroleum" OR "pharmaceutical*" OR "pigment*" OR "piscicide*" OR "plastic" OR "plasticizer*" OR "plastics" OR "pottery" OR "preservative*" OR "pretreatment*" OR "propellant*" OR "pupicide*" OR "resin" OR "resins" OR "refrigerant*" OR "remover*" OR "retardant*" OR "rodenticide*" OR "rust inhibitor*" OR "rust preventative*" OR "sealant*" OR "ski wax*" OR "slimicide*" OR "solvent*" OR "sporting equipment" OR "sporting goods" OR "sports equipment" OR "stuffed animal*" OR "surfactant*" OR "teddy bear*" OR "tobacco" OR "toner" OR "toners" OR "toy" OR "toys" OR "varnish*" OR "weed killer*" OR "wetting agent*") AND ("bioconcentrat*" OR "concentrat*" OR "level" OR "levels"))                                                                                                                                                                                                                                                                                                                   |

| Broad Category              | Tag Category                | Search Terms                                                                                                                                                                                                                                                                                                                                                                                                                                                                                                                                                                                                                                                                                                                                                                                                                                                                                                                                                                                                                                                                                                                                                                                                                                                                                                                                                                                                                                                                                                                                                                                                                                                                                                                                                                                                                                                                                                                                                                                                                                                                                                                                                                                                                                                                                                                                                                                                                                                                                                                                                                                                                                                                                                                                                                                                                                                                                                                                                                                                                                                                                                                                                                                                                                                                                                                                                                                                                     |
|-----------------------------|-----------------------------|----------------------------------------------------------------------------------------------------------------------------------------------------------------------------------------------------------------------------------------------------------------------------------------------------------------------------------------------------------------------------------------------------------------------------------------------------------------------------------------------------------------------------------------------------------------------------------------------------------------------------------------------------------------------------------------------------------------------------------------------------------------------------------------------------------------------------------------------------------------------------------------------------------------------------------------------------------------------------------------------------------------------------------------------------------------------------------------------------------------------------------------------------------------------------------------------------------------------------------------------------------------------------------------------------------------------------------------------------------------------------------------------------------------------------------------------------------------------------------------------------------------------------------------------------------------------------------------------------------------------------------------------------------------------------------------------------------------------------------------------------------------------------------------------------------------------------------------------------------------------------------------------------------------------------------------------------------------------------------------------------------------------------------------------------------------------------------------------------------------------------------------------------------------------------------------------------------------------------------------------------------------------------------------------------------------------------------------------------------------------------------------------------------------------------------------------------------------------------------------------------------------------------------------------------------------------------------------------------------------------------------------------------------------------------------------------------------------------------------------------------------------------------------------------------------------------------------------------------------------------------------------------------------------------------------------------------------------------------------------------------------------------------------------------------------------------------------------------------------------------------------------------------------------------------------------------------------------------------------------------------------------------------------------------------------------------------------------------------------------------------------------------------------------------------------|
| Specialty Products (indoor) | Specialty Products (indoor) | (tiab: ("acaricide*" OR "adhesive" OR "adhesives" OR "antiseptic*" OR "anti septic*" OR "batteries" OR "battery" OR "blowing agent*" OR "bonding agent*" OR "cigar*" OR "circuit board*" OR "circuitry" OR "colorant*" OR "computer*" OR "degreaser*" OR "degreasing" OR "doll" OR "dolls" OR "dye" OR "dyes" OR "electronic" OR "electronics" OR "fiberglass*" OR "fiber glass*" OR "fireproof*" OR "fire proof*" OR "fire retardant*" OR "flameproof*" OR "flame proof*" OR "flame retardant*" OR "glue" OR "glues" OR "ink" OR "inkjet*" OR "lacquer*" OR "leather" OR "leathers" OR "lubricant*" OR "packaging" OR "packing material*" OR "paper" OR "pharmaceutical*" OR "pigment*" OR "plastic" OR "plasticizer*" OR "plastics" OR "pottery" OR "preservative*" OR "pretreatment*" OR "resin" OR "resins" OR "refrigerant*" OR "remover*" OR "retardant*" OR "rodenticide*" OR "rust inhibitor*" OR "rust preventative*" OR "sealant*" OR "slimicide*" OR "solvent*" OR "stuffed animal*" OR "surfactant*" OR "teddy bear*" OR "tobacco" OR "toner" OR "toners" OR "toy" OR "toys" OR "varnish*" OR "wetting agent*") AND ("bioconcentrat*" OR "concentrat*" OR "level" OR "levels"))                                                                                                                                                                                                                                                                                                                                                                                                                                                                                                                                                                                                                                                                                                                                                                                                                                                                                                                                                                                                                                                                                                                                                                                                                                                                                                                                                                                                                                                                                                                                                                                                                                                                                                                                                                                                                                                                                                                                                                                                                                                                                                                                                                                                                                      |
| Evidence Stream             | Human                       | <p>mesh_mh:( humans OR "human development" ) OR tiab: (human* OR person* OR people) OR mesh_mh:( age groups) OR tiab: (pediatric* OR pediatric* OR baby OR babies OR toddler* OR child* OR youth* OR youngster* OR tween* OR teen OR teens OR teenager*) OR tiab:( "in utero" OR prenat* OR perinat* OR neonat* OR postnat*) AND NOT tiab: (mice OR mouse OR rat OR rats)) OR</p> <p>tiab:(preschool* OR "pre-school*" OR kindergarten* OR schoolchild* OR student*) OR tiab:( "middle age*" OR aged OR elder* OR "senior citizen*" OR seniors OR retiree* OR septuagenarian* OR octagenarian* OR sexagenarian* OR nonagenarian* OR centenarian*) OR mesh_mh:( "nuclear family" ) OR tiab:(famil* OR parent* OR father* OR mother* OR sibling* OR brother* OR sister* OR twin OR twins OR "stepfather*" OR "step father*" OR "stepmother*" OR "step mother*" OR "stepdaughter*" OR "step daughter*" OR "stepson*" OR "step son*" OR aunt* OR uncle* OR niece* OR nephew* OR grandparent* OR grandfather* OR "grand father*" OR grandmother* OR "grand mother*" OR grandchild* OR granddaughter* OR grandson* OR spouse* OR partner* OR husband* OR wife OR wives OR guardian* OR caregiver* OR "care giver*") OR</p> <p>mesh_mh:(men OR women) OR tiab:(men OR man OR boy OR boys OR boyhood OR women OR woman OR girl OR girls OR girlhood) OR</p> <p>mesh_mh:( "population groups" OR "vulnerable populations" ) OR tiab:( "african american*" OR "asian american*" OR hispanic* OR latina* OR latino* OR "mexican american*" OR underserved OR disadvantaged) OR</p> <p>mesh_mh:( "epidemiologic studies" OR "double-blind method" OR "single-blind method" ) OR mesh_sh:(epidemiology) OR tiab:( "case control*" OR cohort OR "cross sectional" OR "follow-up study" OR longitudinal OR prospective OR retrospective) OR</p> <p>mesh_pubtype:( "case reports" OR "clinical trial" OR "observational study" OR "randomized control trial" OR "twin study" ) OR tiab:( "clinical trial*" OR observational OR "randomized control trial*") OR</p> <p>mesh_mh:( "research subjects" OR "human experimentation" OR patients OR "Patient Participation" ) OR tiab:( "human subject*" OR "research subject*" OR client* OR patient* OR inpatient* OR outpatient* OR participant* OR volunteer* ) OR</p> <p>mesh_mh:( "occupational groups" OR "occupational exposure" ) OR tiab:( occupation* OR workplace OR "work place" OR "work-related" OR administrator* OR aides OR assistant* OR crew OR crews OR employee* OR personnel OR professional OR staff OR technician* OR worker* OR educator* OR instructor* OR teacher* OR clinician* OR doctor* OR physician* OR pharmacist* OR nurs* OR residents OR veterinarian* ) OR</p> <p>tiab_stemmed:(epidemiologic) OR mesh_mh:( "research subjects" OR "human experimentation" OR patients OR "Patient Participation" ) OR tiab:( "human subject*" OR "research subject*" OR client* OR patient* OR inpatient* OR outpatient* OR participant* OR volunteer* ) OR mesh_mh:( "occupational groups" OR "occupational exposure" ) OR tiab:( occupation* OR workplace OR "work place" OR "work-related" OR administrator* OR aides OR assistant* OR crew OR crews OR employee* OR personnel OR professional OR staff OR technician* OR worker* OR educator* OR instructor* OR teacher* OR clinician* OR doctor* OR physician* OR pharmacist* OR nurs* OR residents OR veterinarian* )</p> |
| Human Exposure Measures     | Exposure and dose           | (tiab: (dose OR doses OR dosing OR dosage* OR expose OR exposed OR exposing OR exposure OR "daily dos*" OR "daily intake" OR "kg/d" OR "kg/day" OR "g/d" OR "g/day" OR "mg/d" OR "mg/day" OR "ug/d" OR "ug/day" OR "µg/d" OR "µg/day" OR "l/d" OR "l/day" OR "ml/d" OR "ml/day" OR "ul/d" OR "ul/day" OR "µl/d" OR "µl/day"))                                                                                                                                                                                                                                                                                                                                                                                                                                                                                                                                                                                                                                                                                                                                                                                                                                                                                                                                                                                                                                                                                                                                                                                                                                                                                                                                                                                                                                                                                                                                                                                                                                                                                                                                                                                                                                                                                                                                                                                                                                                                                                                                                                                                                                                                                                                                                                                                                                                                                                                                                                                                                                                                                                                                                                                                                                                                                                                                                                                                                                                                                                    |
|                             | Body burden                 | (tiab: ("body burden*" OR burden* OR "body-burden*"))                                                                                                                                                                                                                                                                                                                                                                                                                                                                                                                                                                                                                                                                                                                                                                                                                                                                                                                                                                                                                                                                                                                                                                                                                                                                                                                                                                                                                                                                                                                                                                                                                                                                                                                                                                                                                                                                                                                                                                                                                                                                                                                                                                                                                                                                                                                                                                                                                                                                                                                                                                                                                                                                                                                                                                                                                                                                                                                                                                                                                                                                                                                                                                                                                                                                                                                                                                            |



| Broad Category | Tag Category                      | Search Terms                                                                                                                                                                                                                                                                                                                                                                                                                                                                                                                                                                                                                                                                                                                                                                                                                                                                                                                                                                                           |
|----------------|-----------------------------------|--------------------------------------------------------------------------------------------------------------------------------------------------------------------------------------------------------------------------------------------------------------------------------------------------------------------------------------------------------------------------------------------------------------------------------------------------------------------------------------------------------------------------------------------------------------------------------------------------------------------------------------------------------------------------------------------------------------------------------------------------------------------------------------------------------------------------------------------------------------------------------------------------------------------------------------------------------------------------------------------------------|
|                | Bio-monitoring, Biomarker, NHANES | (tiab: ("biological marker*" OR biomonitor* OR "bio-monitor*" OR "biological monitor*" OR biomark* OR "bio-mark*" OR "bio mark*" OR NHANES OR blood OR serum OR plasma OR urine OR "breast milk" OR "human milk" OR "breastmilk" OR "colostrum" OR "foremilk" OR "hindmilk" OR "cord blood" OR "umbilical blood" OR bioaccum* OR "bio-accum*"))                                                                                                                                                                                                                                                                                                                                                                                                                                                                                                                                                                                                                                                        |
|                | Routes of exposure                | (tiab: ("ate" OR "drank" OR "drink" OR "drinking" OR "drinks" OR "eat" OR "eaten" OR "eating" OR "eats" OR "swallow" OR "swallowed" OR "swallowing" OR "breastfed" OR "breast fed" OR breastfeed* OR (("consume" OR "consumed" OR "consumes" OR "consuming" OR "consumpt*" OR "ingest*" OR "intake*") AND ("mouth" OR "mouthing" OR "oral" OR "orally")) OR (("absorb" OR "absorbed" OR "absorbing" OR "absorbs" OR "absorption" OR "adsorb" OR "adsorbed" OR "adsorbing" OR "adsorbs" OR "adsorption" OR "adhere" OR "adhered" OR "adherence" OR "adheres" OR "adhering" OR "adhesion" OR "contact" OR "expose" OR "exposed" OR "exposes" OR "exposing" OR "exposure*") AND ("dermal" OR "dermis" OR "epidermal" OR "epidermis" OR "skin" OR contact OR touch)) OR (("expose" OR "exposed" OR "exposes" OR "exposing" OR "exposure*" OR "intake*") AND ("breath" OR "breathing" OR "inhalation" OR "inhalations" OR "inhale" OR "inhaled" OR "inhales" OR "inhaling" OR "respiration" OR "sniff*")))) |

Notes: SWIFT-Review is a product of Sciome (Howard et al. 2016).

## B Evidence Screening and Data Extraction

We conducted full-text screening and data extraction in two batches. Table S3 shows the full-text screening questions used for the first batch of eight PFAS (PFOA, PFOS, PFBA, PFBS, PFDA, PFNA, PFHxA, PFHxS). Based on lessons learned in the first batch, to improve efficiency and clarity we slightly updated the screening questions for the second batch of 12 PFAS (PFDS, PFDoA, PFNS, PFHpA, PFHpS, PFUdA, PFPeA, PFPeS, 4:2 FTOH, 6:2 FTOH, 8:2 FTOH, 10:2 FTOH) (Table S4); however, the information captured remained the same.

In Table S5 we describe the contents of the extraction databases.

Below the table, we provide some additional information on the country of origin.

Finally, we provide the databases of extracted information at the bottom of this section.

*Table S3. Screening Questions for First Batch of Full-text Screens*

| Screening Question                                                                                               | Notes                                                                                                                                                                                                                                                                                               |
|------------------------------------------------------------------------------------------------------------------|-----------------------------------------------------------------------------------------------------------------------------------------------------------------------------------------------------------------------------------------------------------------------------------------------------|
| Does this study have any extractable primary data?                                                               | Yes/No                                                                                                                                                                                                                                                                                              |
| Does this study contain relevant secondary data?                                                                 | Yes/No                                                                                                                                                                                                                                                                                              |
| Does this study contain relevant cohort data?                                                                    | Yes/No<br><ul style="list-style-type: none"> <li>• A marker for biomonitoring data from a cohort study, if database users wish to explore those data further (we did not intentionally extract cohort data, though some incidentally extracted cohort data are in a separate data sheet)</li> </ul> |
| --If so, what is the cohort name(s)?                                                                             | Text field to provide cohort name                                                                                                                                                                                                                                                                   |
| Are relevant data or information potentially pertinent to exposures provided in supporting material/information? | Yes/No<br><ul style="list-style-type: none"> <li>• A marker for data in supplementary information (SI), based on how the SI were described in the main article. We extracted only what was described in the main article. Database users may wish to explore SI data further.</li> </ul>            |
| Are there primary extractable data on other PFAS?                                                                | Yes/No<br><ul style="list-style-type: none"> <li>• A marker for data on other PFAS besides the target ones, if database users wish to explore those data further (we did not extract data on PFAS other than the target ones)</li> </ul>                                                            |
| --If so, which other PFAS?                                                                                       | Text field to list the other PFAS studied                                                                                                                                                                                                                                                           |
| Does this study contain questionnaire data?                                                                      | Yes/No<br><ul style="list-style-type: none"> <li>• A marker for data on human participants collected by study questionnaire, if database users wish to explore those data further (we did not extract questionnaire data)</li> </ul>                                                                |
| What is the funding source for this study?                                                                       | Text field to provide the source of funding/support for the study                                                                                                                                                                                                                                   |
| Overall notes                                                                                                    | Text field to provide any useful information on the study                                                                                                                                                                                                                                           |

Table S4. Screening Questions for Second Batch of Full-text Screens

| Screening Question                                                                                         | Notes                                                                                                                                                                                                                                                                                             |
|------------------------------------------------------------------------------------------------------------|---------------------------------------------------------------------------------------------------------------------------------------------------------------------------------------------------------------------------------------------------------------------------------------------------|
| Is the main article's full text available in HERO and is it in English?                                    | Yes/No<br><ul style="list-style-type: none"> <li>If answer is no, then do not answer any additional questions</li> </ul>                                                                                                                                                                          |
| Is this a relevant study?                                                                                  | Yes/No                                                                                                                                                                                                                                                                                            |
| Are there any relevant extractable values for limits, detection frequencies, or stats in the main article? | Yes/No                                                                                                                                                                                                                                                                                            |
| Are any of the relevant data from inside the US, Canada, or Europe?                                        | Yes/No                                                                                                                                                                                                                                                                                            |
| Does the study contain secondary data that are otherwise relevant?                                         | Yes/No<br><ul style="list-style-type: none"> <li>A marker for secondary data, if database users wish to explore those data further (we did not knowingly extract secondary data)</li> </ul>                                                                                                       |
| Does this study contain relevant cohort data for human biomonitoring?                                      | Yes/No<br><ul style="list-style-type: none"> <li>A marker for biomonitoring data from a cohort study, if database users wish to explore those data further (we did not intentionally extract cohort data, though some incidentally extracted cohort data are in a separate data sheet)</li> </ul> |
| --If so, what is the cohort name(s)?                                                                       |                                                                                                                                                                                                                                                                                                   |
| Are relevant data available in supplementary material?                                                     | Yes/No<br><ul style="list-style-type: none"> <li>A marker for data in supplementary information (SI), based on how the SI were described in the main article. We extracted only what was described in the main article. Database users may wish to explore SI data further.</li> </ul>            |
| --If so, is that the only place in the paper where relevant data are presented?                            | Yes/No                                                                                                                                                                                                                                                                                            |
| Are relevant data available for other PFAS?                                                                | Yes/No<br><ul style="list-style-type: none"> <li>A marker for data on other PFAS besides the target ones, if database users wish to explore those data further (we did not extract data on PFAS other than the target ones)</li> </ul>                                                            |
| --If so, which other PFAS                                                                                  | Text field to list the other PFAS studied                                                                                                                                                                                                                                                         |
| Does the study contain questionnaire data?                                                                 | Yes/No<br><ul style="list-style-type: none"> <li>A marker for data on human participants collected by study questionnaire, if database users wish to explore those data further (we did not extract questionnaire data)</li> </ul>                                                                |
| What is the funding source for this study?                                                                 | Text field to provide source of funding/support for the study                                                                                                                                                                                                                                     |
| Overall notes                                                                                              | Text field to provide any useful information on the study                                                                                                                                                                                                                                         |



Table S5. Types of Information Recorded for Data Extraction

| Data                                   |                                      |                                                                                                                                                                                                                                                                                                                                                                                                                                                                                                                                                                                                                  |
|----------------------------------------|--------------------------------------|------------------------------------------------------------------------------------------------------------------------------------------------------------------------------------------------------------------------------------------------------------------------------------------------------------------------------------------------------------------------------------------------------------------------------------------------------------------------------------------------------------------------------------------------------------------------------------------------------------------|
| Category                               | Data Prompts                         | Notes                                                                                                                                                                                                                                                                                                                                                                                                                                                                                                                                                                                                            |
| Population/<br>Location<br>Information | Pop / Geo desc                       | <ul style="list-style-type: none"> <li>Brief description (desc) of the study population (pop) or geography (geo)</li> </ul>                                                                                                                                                                                                                                                                                                                                                                                                                                                                                      |
|                                        | City                                 |                                                                                                                                                                                                                                                                                                                                                                                                                                                                                                                                                                                                                  |
|                                        | State                                |                                                                                                                                                                                                                                                                                                                                                                                                                                                                                                                                                                                                                  |
|                                        | Country                              |                                                                                                                                                                                                                                                                                                                                                                                                                                                                                                                                                                                                                  |
| Media Information                      | Medium name                          | <ul style="list-style-type: none"> <li>Options: Ambient air, Consumer product, Drinking water, Food:breast milk, Food:dairy, Food:fats, Food:fruit, Food:grain, Food:meat, Food:other, Food:seafood, Food:vegetable, Food packaging, Human blood (whole blood serum plasma cord blood), Human urine, Indoor air, Indoor dust, Soil.</li> <li>Also the following non-target media: Biosolids, Landfill leachate, Sediment, Sewage sludge, Wastewater:influent, Wastewater:effluent, Other (the latter only available for the first batch of 8 PFAS [PFOA, PFOS, PFBA, PFBS, PFDA, PFNA, PFHxA, PFHxS])</li> </ul> |
|                                        | If Medium name = other, specify here | (this field only available for the first batch of 8 PFAS [PFOA, PFOS, PFBA, PFBS, PFDA, PFNA, PFHxA, PFHxS])                                                                                                                                                                                                                                                                                                                                                                                                                                                                                                     |
|                                        | Medium sub-matrix                    | If additional specificity is needed for the medium name                                                                                                                                                                                                                                                                                                                                                                                                                                                                                                                                                          |
|                                        | Location type                        | General population or impacted (if impacted, name or describe the site)                                                                                                                                                                                                                                                                                                                                                                                                                                                                                                                                          |
|                                        | --Impacted site name                 |                                                                                                                                                                                                                                                                                                                                                                                                                                                                                                                                                                                                                  |
|                                        | Number of env/collection sites       | If the medium is a human endpoint then enter the number of human participants and leave environmental (env) sites as "NA". If the medium is an indoor or environmental endpoint then enter the number of geographic sites sampled and leave human participants as "NA".                                                                                                                                                                                                                                                                                                                                          |
|                                        | Number of participants in human data |                                                                                                                                                                                                                                                                                                                                                                                                                                                                                                                                                                                                                  |
|                                        | Data start year                      | Period of sample collection                                                                                                                                                                                                                                                                                                                                                                                                                                                                                                                                                                                      |
|                                        | Data end year                        |                                                                                                                                                                                                                                                                                                                                                                                                                                                                                                                                                                                                                  |
|                                        | Data time period                     |                                                                                                                                                                                                                                                                                                                                                                                                                                                                                                                                                                                                                  |
|                                        | Notes on data sampling               | Text fields to provide any useful information on the sampling and analytical methods                                                                                                                                                                                                                                                                                                                                                                                                                                                                                                                             |
| Analytical methods                     |                                      |                                                                                                                                                                                                                                                                                                                                                                                                                                                                                                                                                                                                                  |
| Chemical Information                   | Chem abbr                            | <ul style="list-style-type: none"> <li>Chemical (chem) abbreviation (abbr) and full name</li> <li>Provide the full chemical name as stated by the study authors</li> </ul>                                                                                                                                                                                                                                                                                                                                                                                                                                       |
|                                        | Chem name                            |                                                                                                                                                                                                                                                                                                                                                                                                                                                                                                                                                                                                                  |
|                                        | DF value category                    | (this field only available for the second batch of 12 PFAS [PFDS, PFDoA, PFNS, PFHpA, PFHpS, PFUdA, PFPeA, PFPeS, 4:2 FTOH, 6:2 FTOH, 8:2 FTOH, 10:2 FTOH]) <ul style="list-style-type: none"> <li>DF = detection frequency</li> <li>Options: NR, 0, Above 0</li> </ul>                                                                                                                                                                                                                                                                                                                                          |
|                                        | DF                                   | DF as a fraction                                                                                                                                                                                                                                                                                                                                                                                                                                                                                                                                                                                                 |

| Data Category    | Data Prompts                             | Notes                                                                                                                                                                                                   |
|------------------|------------------------------------------|---------------------------------------------------------------------------------------------------------------------------------------------------------------------------------------------------------|
|                  | DF reported, or calculated by extractor? |                                                                                                                                                                                                         |
|                  | LOD (method detection limit)             | LOD = limit of detection                                                                                                                                                                                |
|                  | LOQ (method reporting limit)             | LOQ = limit of quantification                                                                                                                                                                           |
|                  | Units of LOD and LOQ                     |                                                                                                                                                                                                         |
|                  | Notes on DF, LOD, LOQ                    | Text field to provide any useful information on the limits (also on DF for the second batch of 12 PFAS [PFDS, PFDoA, PFNS, PFHpA, PFHpS, PFUdA, PFPeA, PFPeS, 4:2 FTOH, 6:2 FTOH, 8:2 FTOH, 10:2 FTOH]) |
| Stat Information | Stat name                                | Brief description of the occurrence statistic (stat)                                                                                                                                                    |
|                  | Stat type                                | Pull-down options: Arithmetic Mean, Geometric Mean, Median, Min, Max, Percentile, Variance, Std. Deviation, Standard Error, GSD, Point                                                                  |
|                  | Final stat type                          | Added to the database during post-processing; includes the options of the "Stat type" field but specifies the percentile values (e.g., P05 for 5th percentile)                                          |
|                  | Stat est                                 | Value (est = estimate), units, and fraction if applicable (e.g., dry versus wet weight, vapor versus particle, etc.) for the occurrence stat                                                            |
|                  | Stat units                               | Whether it was reported by the authors or calculated by the extractor                                                                                                                                   |
|                  | Stat fraction                            |                                                                                                                                                                                                         |
|                  | Sample n                                 | Number (n) of samples included in the occurrence statistic                                                                                                                                              |
|                  | Stat notes                               | Text field to provide any useful information on the occurrence stat                                                                                                                                     |
| Overall Notes    | Overall Notes                            | Text field to provide any useful information on the study                                                                                                                                               |

### **Countries where PFAS Measurements were Made**

TiAb screens do not necessarily accurately describe the content of the full paper. As such, a relatively small number of papers having all PFAS measurements taken outside of the US, Canada, and Europe entered the full-text screens. The full-text screens then provided another opportunity to apply the PECO criteria and allow only the relevant papers to enter data extraction. While our goal was to not extract measurements from outside the US, Canada, and Europe, for a relatively small number of papers, we unintentionally extracted such data, which we refer to as incidental data; in our database of extracted data, we moved these incidental data to a separate data sheet.

### **Extraction Databases**

“8 PFAS Extraction Database\_For Manuscript.xlsx” and “12 PFAS Extraction Database\_for Manuscript.xlsx” are Microsoft Excel files of the tags from full-text screening and extracted data from this SEM. The “8 PFAS” refers to the first batch of eight PFAS (PFOA, PFOS, PFBA, PFBS, PFDA, PFNA, PFHxA, PFHxS) and the “12 PFAS” refers to the second batch of 12 PFAS (PFDS, PFDoA, PFNS, PFHpA, PFHpS, PFUdA, PFPeA, PFPeS, 4:2 FTOH, 6:2 FTOH, 8:2 FTOH, 10:2 FTOH).

## C Human Biomonitoring Data

During TiAb screening, reviewers were also asked to tag studies with human biomonitoring data for potential future use. We further explored the studies with only biomonitoring data for the first batch of 8 PFAS (PFOA, PFOS, PFBA, PFBS, PFDA, PFNA, PFHxA, PFHxS), which are the most well-studied PFAS. From TiAb screening, we identified 454 references as biomonitoring-only references, of which 422 were identified as PECO-relevant during FT screens and we recorded information on the cohorts used in those studies (if any). Studies then proceeded to a “light extraction” step (see below). Biomonitoring-only references from the second batch of 12 PFAS (PFDS, PFDoA, PFNS, PFHpA, PFHpS, PFUdA, PFPeA, PFPeS, 4:2 FTOH, 6:2 FTOH, 8:2 FTOH, 10:2 FTOH) were not further explored in this way.

During “light extraction”, we applied an abbreviated extraction protocol to capture qualitative aspects of their data. This information included the tags from full-text screening plus descriptions of the study populations and geographies, and names of the media and PFAS with relevant primary data. However, the information did not include numeric data on detection frequencies, occurrence values, etc., nor did it indicate what were the combinations of population, geography, media, and PFAS presented (we named them individually without indicating which specific PFAS were sampled for which media, for example). For 37 references that met the relevancy criteria except for all their data samples coming from outside of the US, Canada, and Europe, we indicated that these references were relevant and recorded their location, media, and chemical information as appropriate. We did this because the abbreviated nature of these “light extractions” allowed us to quickly indicate what these references contained, for use by future researchers who might interested in studies from these locations.

In Table S6 we describe the contents of the “light extraction” database.

Below the table, we provide some additional information on the handling of cohort data.

The database of “light extractions” is located as a separate tab in the databases of extracted information.

Table S6. Types of Information Recorded for Data Extraction

| Data Category                           | Data Prompts            | Notes                                                                                                                                                                                                                                                                                                   |
|-----------------------------------------|-------------------------|---------------------------------------------------------------------------------------------------------------------------------------------------------------------------------------------------------------------------------------------------------------------------------------------------------|
| Population/<br>Geography<br>Information | Country                 | <ul style="list-style-type: none"> <li>This is only regional: Data from US, Data from Canada or Europe, Data from Outside US Canada or Europe</li> </ul>                                                                                                                                                |
|                                         | Geography               | <ul style="list-style-type: none"> <li>Brief description (desc) of the geography (geo)</li> </ul>                                                                                                                                                                                                       |
|                                         | Population              | <ul style="list-style-type: none"> <li>Brief description (desc) of the study population (pop)</li> </ul>                                                                                                                                                                                                |
|                                         | Human data from Cohort? |                                                                                                                                                                                                                                                                                                         |
|                                         | Cohort name             |                                                                                                                                                                                                                                                                                                         |
| Media Information                       | Medium name             | <ul style="list-style-type: none"> <li>Options: Ambient air, Consumer product, Drinking water, Food:breast milk, Food:dairy, Food:fats, Food:fruit, Food:grain, Food:meat, Food:other, Food:seafood, Food:vegetable, Food packaging, Human Blood/Serum/Urine, Indoor air, Indoor dust, Soil.</li> </ul> |



| Data                 |               |                                                                                                                                        |
|----------------------|---------------|----------------------------------------------------------------------------------------------------------------------------------------|
| Category             | Data Prompts  | Notes                                                                                                                                  |
|                      |               | <ul style="list-style-type: none"> <li>Also the following non-target media: Landfill, Sediment, Wastewater/Biosolids/Sludge</li> </ul> |
| Chemical Information | Chemicals     | <ul style="list-style-type: none"> <li>Options: PFOA, PFOS, PFBA, PFBS, PFDA, PFNA, PFHxA, PFHxS, Other</li> </ul>                     |
| Overall Notes        | Overall Notes | Text field to provide any useful information on the study                                                                              |

### **Cohort Data**

We considered data on human biomonitoring from cohort studies to be secondary data and not relevant for our purposes (i.e., not primary data), though our treatment of this cohort exception evolved over the course of the project:

- During early batches of TiAb screens for the first batch of 8 PFAS, for papers with TiAbs suggesting only human biomonitoring data from cohorts were collected, we did not exclude them from proceeding to full-text screens unless another criterion of the PECO was not met.
- In later TiAb screens (later in the first batch of 8 PFAS, and in all of the second batch of 12 PFAS), TiAb screeners recorded cohort information that we used to exclude those papers from proceeding to full-text screens.
- If papers where the only occurrence data were from cohort biomonitoring entered the full-text screens, the full-text screens then provided another opportunity to apply the PECO criteria and exclude these papers from data extraction.
- Our goal was to not extract human biomonitoring data from cohort studies. For papers with biomonitoring data both from cohort studies and non-cohort studies, our goal was to extract only the non-cohort data. However, for a relatively small number of papers, we unintentionally extracted cohort data, which we refer to as incidental data; in our databases of extracted data, we moved these incidental cohort data to a separate data sheet.
